# Supplementary material for: Epidemiology of herpes simplex virus type 2 in Latin America and the Caribbean: systematic review, meta-analyses and metaregressions
Source: HighWire-hosted journal article supplement (doi:10.1136/sextrans-2021-054972), 2021-06-04
Supplement: sextrans-2021-054972supp001_data_supplement.pdf [file sextrans-2021-054972supp001_data_supplement.pdf]

**Web extra material****Epidemiology of herpes simplex virus type 2 in Latin America and the Caribbean: systematic review, meta-analyses, and meta-regressions**

Manale Harfouche MPH<sup>a,b</sup>, Haifa Maalmi PhD<sup>a,c</sup>, and Laith J. Abu-Raddad PhD<sup>a,b,d</sup>

<sup>a</sup> *Infectious Disease Epidemiology Group, Weill Cornell Medicine-Qatar, Cornell University, Qatar Foundation - Education City, Doha, Qatar*

<sup>b</sup> *World Health Organization Collaborating Centre for Disease Epidemiology Analytics on HIV/AIDS, Sexually Transmitted Infections, and Viral Hepatitis, Weill Cornell Medicine-Qatar, Cornell University, Qatar Foundation – Education City, Doha, Qatar*

<sup>c</sup> *Institute for Clinical Diabetology, German Diabetes Center, Leibniz Center for Diabetes Research at Heinrich Heine University Dusseldorf, Dusseldorf, Germany;*

<sup>d</sup> *Department of Population Health Sciences, Weill Cornell Medicine, Cornell University, New York, New York, US*

## Table of Contents

|                                                                                                                                                                                                                                                                                                                                                |    |
|------------------------------------------------------------------------------------------------------------------------------------------------------------------------------------------------------------------------------------------------------------------------------------------------------------------------------------------------|----|
| <b>Table S1.</b> Preferred Reporting Items for Systematic Reviews and Meta-analyses (PRISMA) checklist. <sup>1</sup> .....                                                                                                                                                                                                                     | 3  |
| <b>Table S2.</b> Data sources and search criteria for systematically reviewing HSV-2 epidemiology in Latin America and the Caribbean. ....                                                                                                                                                                                                     | 5  |
| <b>Box S1.</b> Definitions of population type classifications <sup>a</sup> . ....                                                                                                                                                                                                                                                              | 7  |
| <b>Table S3.</b> Studies reporting HSV-2 seroconversion rate or incidence rate in Latin America and the Caribbean. ....                                                                                                                                                                                                                        | 8  |
| <b>Table S4.</b> Studies reporting HSV-2 seroprevalence in Latin America and the Caribbean by population type.....                                                                                                                                                                                                                             | 9  |
| <b>Figure S1.</b> Forest plots presenting the outcomes of the pooled mean herpes simplex virus type 2 (HSV-2) seroprevalence among the different at risk populations in Latin America and the Caribbean. ....                                                                                                                                  | 13 |
| A) General populations.....                                                                                                                                                                                                                                                                                                                    | 13 |
| B) Intermediate-risk populations.....                                                                                                                                                                                                                                                                                                          | 17 |
| C) High-risk populations.....                                                                                                                                                                                                                                                                                                                  | 18 |
| D) STI clinic attendees and symptomatic populations (mixed women and men).....                                                                                                                                                                                                                                                                 | 19 |
| F) HIV positive individuals and individuals in HIV discordant couples.....                                                                                                                                                                                                                                                                     | 20 |
| G) Other populations .....                                                                                                                                                                                                                                                                                                                     | 21 |
| <b>Table S5.</b> Univariable and multivariable meta-regression analyses for HSV-2 seroprevalence among the different at risk populations in Latin America and the Caribbean using each of country's income and country <i>instead</i> of subregion in the multivariable meta-regression.....                                                   | 22 |
| <b>Table S6.</b> Univariable and multivariable meta-regression analyses for HSV-2 seroprevalence among the different at-risk populations in Latin America and the Caribbean using the year of data collection as the temporal variable. The analysis using year of publication as the temporal variable is found in Table 3 of main text. .... | 24 |
| <b>Table S7.</b> Studies reporting proportions of HSV-2 virus isolation in clinically-diagnosed genital ulcer disease and in clinically-diagnosed genital herpes in Latin America and the Caribbean. ....                                                                                                                                      | 26 |
| <b>Figure S2.</b> Forest plots presenting the outcomes of the pooled mean proportions of HSV-2 virus isolation in clinically-diagnosed genital ulcer disease and in clinically-diagnosed genital herpes in Latin America and the Caribbean. ....                                                                                               | 27 |
| A) Patients with GUD .....                                                                                                                                                                                                                                                                                                                     | 27 |
| B) Patients with genital herpes.....                                                                                                                                                                                                                                                                                                           | 28 |
| <b>Table S8.</b> Summary of the precision assessment and risk of bias assessment for the studies reporting HSV-2 seroprevalence in Latin America and the Caribbean. ....                                                                                                                                                                       | 29 |
| <b>References</b> .....                                                                                                                                                                                                                                                                                                                        | 30 |

**Table S1.** Preferred Reporting Items for Systematic Reviews and Meta-analyses (PRISMA) checklist.<sup>1</sup>

| Section/topic                      | #  | Checklist item                                                                                                                                                                                                                                                                                              | Reported in main text on |
|------------------------------------|----|-------------------------------------------------------------------------------------------------------------------------------------------------------------------------------------------------------------------------------------------------------------------------------------------------------------|--------------------------|
| <b>Title</b>                       |    |                                                                                                                                                                                                                                                                                                             |                          |
| Title                              | 1  | Identify the report as a systematic review, meta-analysis, or both.                                                                                                                                                                                                                                         | p.1                      |
| <b>Abstract</b>                    |    |                                                                                                                                                                                                                                                                                                             |                          |
| Structured summary                 | 2  | Provide a structured summary including, as applicable: background; objectives; data sources; study eligibility criteria, participants, and interventions; study appraisal and synthesis methods; results; limitations; conclusions and implications of key findings; systematic review registration number. | p. 2                     |
| <b>Introduction</b>                |    |                                                                                                                                                                                                                                                                                                             |                          |
| Rationale                          | 3  | Describe the rationale for the review in the context of what is already known.                                                                                                                                                                                                                              | p. 5-6                   |
| Objectives                         | 4  | Provide an explicit statement of questions being addressed with reference to participants, interventions, comparisons, outcomes, and study design (PICOS).                                                                                                                                                  | p. 5-6                   |
| <b>Methods</b>                     |    |                                                                                                                                                                                                                                                                                                             |                          |
| Protocol and registration          | 5  | Indicate if a review protocol exists, if and where it can be accessed (e.g., Web address), and, if available, provide registration information including registration number.                                                                                                                               | NA                       |
| Eligibility criteria               | 6  | Specify study characteristics (e.g., PICOS, length of follow-up) and report characteristics (e.g., years considered, language, publication status) used as criteria for eligibility, giving rationale.                                                                                                      | p. 6; Box 1              |
| Information sources                | 7  | Describe all information sources (e.g., databases with dates of coverage, contact with study authors to identify additional studies) in the search and date last searched.                                                                                                                                  | p. 6; Box 1              |
| Search                             | 8  | Present full electronic search strategy for at least one database, including any limits used, such that it could be repeated.                                                                                                                                                                               | Table S2                 |
| Study selection                    | 9  | State the process for selecting studies (i.e., screening, eligibility, included in systematic review, and, if applicable, included in the meta-analysis).                                                                                                                                                   | p. 6; Box 1              |
| Data collection process            | 10 | Describe method of data extraction from reports (e.g., piloted forms, independently, in duplicate) and any processes for obtaining and confirming data from investigators.                                                                                                                                  | p. 6; Box 1              |
| Data items                         | 11 | List and define all variables for which data were sought (e.g., PICOS, funding sources) and any assumptions and simplifications made.                                                                                                                                                                       | Box 1                    |
| Risk of bias in individual studies | 12 | Describe methods used for assessing risk of bias of individual studies (including specification of whether this was done at the study or outcome level), and how this information is to be used in any data synthesis.                                                                                      | p. 7; Box 1              |
| Summary measures                   | 13 | State the principal summary measures (e.g., risk ratio, difference in means).                                                                                                                                                                                                                               | p. 7; Box 1              |
| Synthesis of results               | 14 | Describe the methods of handling data and combining results of studies, if done, including measures of consistency (e.g., I <sup>2</sup> ) for each meta-analysis.                                                                                                                                          | p. 7; Box 1              |
| Risk of bias across studies        | 15 | Specify any assessment of risk of bias that may affect the cumulative evidence (e.g., publication bias, selective reporting within studies).                                                                                                                                                                | p. 7; Box 1              |
| Additional analyses                | 16 | Describe methods of additional analyses (e.g., sensitivity or subgroup analyses, meta-regression), if done, indicating                                                                                                                                                                                      | p. 7; Box 1              |

|                               |    |                                                                                                                                                                                                          |                                                |
|-------------------------------|----|----------------------------------------------------------------------------------------------------------------------------------------------------------------------------------------------------------|------------------------------------------------|
|                               |    | which were pre-specified.                                                                                                                                                                                |                                                |
| <b>Results</b>                |    |                                                                                                                                                                                                          |                                                |
| Study selection               | 17 | Give numbers of studies screened, assessed for eligibility, and included in the review, with reasons for exclusions at each stage, ideally with a flow diagram.                                          | p. 7-8; Figure 1                               |
| Study characteristics         | 18 | For each study, present characteristics for which data were extracted (e.g., study size, PICOS, follow-up period) and provide the citations.                                                             | p. 8 and p. 11; Tables S3, S4, and S7          |
| Risk of bias within studies   | 19 | Present data on risk of bias of each study and, if available, any outcome level assessment (see item 12).                                                                                                | p. 11; Table S8                                |
| Results of individual studies | 20 | For all outcomes considered (benefits or harms), present, for each study: (a) simple summary data for each intervention group (b) effect estimates and confidence intervals, ideally with a forest plot. | p. 7-11; Tables 1, 2, and 3; Figures S1 and S2 |
| Synthesis of results          | 21 | Present results of each meta-analysis done, including confidence intervals and measures of consistency.                                                                                                  | p. 9-10; Tables 1, 2, and 4; Figures S1 and S2 |
| Risk of bias across studies   | 22 | Present results of any assessment of risk of bias across studies (see Item 15).                                                                                                                          | p. 11; Table S8                                |
| Additional analysis           | 23 | Give results of additional analyses, if done (e.g., sensitivity or subgroup analyses, meta-regression [see Item 16]).                                                                                    | p. 9-10; Table 3; Tables S5 and S6             |
| <b>Discussion</b>             |    |                                                                                                                                                                                                          |                                                |
| Summary of evidence           | 24 | Summarize the main findings including the strength of evidence for each main outcome; consider their relevance to key groups (e.g., healthcare providers, users, and policy makers).                     | p. 12-14                                       |
| Limitations                   | 25 | Discuss limitations at study and outcome level (e.g., risk of bias), and at review-level (e.g., incomplete retrieval of identified research, reporting bias).                                            | p. 14                                          |
| Conclusions                   | 26 | Provide a general interpretation of the results in the context of other evidence, and implications for future research.                                                                                  | p. 14-15                                       |
| <b>funding</b>                |    |                                                                                                                                                                                                          |                                                |
| Funding                       | 27 | Describe sources of funding for the systematic review and other support (e.g., supply of data); role of funders for the systematic review.                                                               | p. 3                                           |

Abbreviations: NA = Not applicable, p = page

**Table S2.** Data sources and search criteria for systematically reviewing HSV-2 epidemiology in Latin America and the Caribbean.

| <b>PubMed (last searched: March 12, 2020)</b>                                                                                                                                                                                                                                                                                                                                                                                                                                                                                                                                                                                                                                                                                                                                                                                                                                                                                                                                                                                                                                                                                                                                                                                                                                                                                                                                                                                                                                                                                                                                                                                                                                                                                                                                                                                                                                                                                                                                                                                                                                                                                                                              |
|----------------------------------------------------------------------------------------------------------------------------------------------------------------------------------------------------------------------------------------------------------------------------------------------------------------------------------------------------------------------------------------------------------------------------------------------------------------------------------------------------------------------------------------------------------------------------------------------------------------------------------------------------------------------------------------------------------------------------------------------------------------------------------------------------------------------------------------------------------------------------------------------------------------------------------------------------------------------------------------------------------------------------------------------------------------------------------------------------------------------------------------------------------------------------------------------------------------------------------------------------------------------------------------------------------------------------------------------------------------------------------------------------------------------------------------------------------------------------------------------------------------------------------------------------------------------------------------------------------------------------------------------------------------------------------------------------------------------------------------------------------------------------------------------------------------------------------------------------------------------------------------------------------------------------------------------------------------------------------------------------------------------------------------------------------------------------------------------------------------------------------------------------------------------------|
| (Simplexvirus[MeSH] OR Herpes Simplex[MeSH] OR Herpes Genitalis[MeSH] OR Herpes Hominis[Text] OR HSV type-2[Text] OR HSV type 2[Text] OR HSV2[Text] OR HSV-2[Text] OR HSV [Text] OR Human herpes virus[Text] OR Herpes simplex virus type 2[Text] OR Herpes simplex virus type-2[Text] OR herpes simplex virus 2[Text] OR herpes simplex virus-2[Text] OR herpes simplex type 2[Text] OR herpes simplex type-2[Text] OR herpes simplex 2[Text] OR herpes simplex-2[Text] OR Herpesvirus type 2[Text] OR Herpesvirus type-2[Text] OR Herpesvirus 2[Text] OR Herpesvirus-2[Text] OR Herpes virus type 2[Text] OR Herpes virus type-[Text] OR Herpes virus [Text] OR Herpes virus-2[Text] OR genital herpes[Text] OR Herpes Genitalis[Text] OR Stomatitis Herpetic[Text] OR Herpes Labialis[Text]) AND (“Latin America”[MeSH] OR “Central America”[MeSH] OR “South America”[Mesh] OR “Caribbean Region”[MeSH] OR “Mexico”[MeSH]) OR (Anguilla*[Text] OR Aruba*[Text] OR Antigua and Barbuda[Text] OR Argentin*[Text] OR Bahamas*[Text] OR Barbados*[Text] OR Beliz*[Text] OR Bermuda*[Text] OR Bolivia*[Text] OR Brazil*[text] OR “British Virgin Islands”[Text] OR Latin America[Text] OR Latin American*[Text] OR Caribbean*[Text] OR Cayman Islands[Text] OR Chile*[Text] OR Colombia*[Text] OR Costa Rica*[Text] OR Cuba*[Text] OR Curacao*[Text] OR Central America[Text] OR Central American*[text] OR Dominica*[Text] OR Dominican republic[Text] OR Ecuador*[Text] OR El Salvador[Text] OR French Guiana[Text] OR Grenad*[Text] OR Guadeloup*[Text] OR Guatemal*[Text] OR Guyan*[Text] OR Haiti*[Text] OR Honduras*[Text] OR Jamaic*[Text] OR Martiniqu*[Text] OR Montserrat*[Text] OR Mexic*[Text] OR Nicaragua*[Text] OR Panama*[Text] OR Paraguay*[Text] OR Peru*[Text] OR Puerto Rico[Text] OR Puerto Rica*[text] OR Saint Kitts and Nevis[Text] OR Saint Lucia[Text] OR Saint Vincent and the Grenadines[Text] OR Suriname*[Text] OR Saint Martin[Text] OR Sint Maarten[Text] OR South America[Text] OR South American*[Text] OR Trinidad and Tobago[Text] OR Turks and Caicos[Text] OR Uruguay*[Text] OR United States Virgin Islands[Text] OR Venezuel*[Text]) |
| <b>Embase (last searched: March 12, 2020)</b>                                                                                                                                                                                                                                                                                                                                                                                                                                                                                                                                                                                                                                                                                                                                                                                                                                                                                                                                                                                                                                                                                                                                                                                                                                                                                                                                                                                                                                                                                                                                                                                                                                                                                                                                                                                                                                                                                                                                                                                                                                                                                                                              |
| (exp Herpes simplex/ or exp Herpesviridae/) OR (Herpes simplex or Herpes simplex virus or HSV type-2 or HSV type 2 or HSV2 or HSV-2 or HSV 2 or human herpes virus or Herpes simplex virus type 2 or Herpes simplex virus type-2 or herpes simplex virus 2 or herpes simplex virus-2 or herpes simplex type 2 or herpes simplex type-2 or herpes simplex 2 or herpes simplex-2 or Herpesvirus type 2 or Herpesvirus type-2 or Herpesvirus 2 or Herpesvirus-2 or Herpes virus type 2 or Herpes virus type-2 or Herpes virus 2 or Herpes virus-2 or genital herpes or Herpes Genitalis or herpes labialis or herpetic stomatitis).mp.) AND (exp "Antigua and Barbuda"/ or exp Argentina/ or exp Aruba/ or exp Bahamas/ or exp Barbados/ or exp Belize/ or exp Bolivia/ or exp Brazil/ or exp "Virgin Islands (British)"/ or exp Cayman Islands/ or exp Chile/ or exp Colombia/ or exp Costa Rica/ or exp Cuba/ or exp Curacao/ or exp Dominica/ or exp Dominican Republic/ or exp Ecuador/ or exp El Salvador/ or exp French Guiana/ or exp Grenada/ or exp Guadeloupe/ or exp Guatemala/ or exp Guyana/ or exp Haiti/ or exp Honduras/ or exp Jamaica/ or exp Martinique/ or exp Mexico/ or exp Montserrat/ or exp Nicaragua/ or exp Panama/ or exp Paraguay/ or exp Peru/ or exp Puerto Rico/ or exp Saint Lucia/ or exp "saint martin (dutch)"/ or exp "saint martin (french)"/ or exp Suriname/) or (exp "Trinidad and Tobago"/ or exp "Virgin Islands (U.S.)"/ or exp Uruguay/ or exp Venezuela/ or exp South America/ or exp Central America/ or exp Caribbean/ or exp "Caribbean (person)"/ or exp Caribbean Netherlands/ or exp Caribbean Islands/ or exp South American/ or exp Central American/ or exp Latin America/) or (Antigua or Argentina or Argentinian or Aruba or Aruban or Bahamas or Belize or belizian or Bolivia or Bolivian or Brazil or Brazilian or British virgin islands or Cayman islands or Chile or Chilean or Colombia or Colombian or Costa Rica or costa Rican or Cuba or Cuban or Curacao or Dominica or Dominican or Dominican republic or Ecuador or Ecuadorian or el Salvador                                                         |

or el Salvadorian ).mp. or (French Guiana or Grenada or Guadeloupe or Guatemala or Guatemalan or Guyana or Haitian or Honduras or Honduran or Jamaica or Jamaican or Martinique or Mexico or Mexican or Montserrat or Nicaragua or Nicaraguan or panama or Panamanian or Paraguay or Paraguayans or Peru or Peruvian\* or Puerto Rico or Puerto Ricans or saint Lucia or saint Lucian or Latin America\* or south American\* or central American\*).mp. or ((Turks and caicos) or (saint Vincents and the grenadines) or (saint kitts and the nevis)).mp.

**LILACS (last searched: March 12, 2020)**

((tw:(herpes)) OR (tw:(herpesvirus 2)) OR (tw:(herpes simplex)) OR (tw:(hsv type-2)) OR (tw:(hsv type 1)) OR (tw:(hsv2)) OR (tw:(hsv-2)) OR (tw:(hsv 2)) OR (tw:(human herpes virus)) OR (tw:(herpes simplex virus type 2)) OR (tw:(herpes simplex virus type-2)) OR (tw:(herpes simplex virus 2)) OR (tw:(herpes simplex virus-2)) OR (tw:(herpes simplex type 2)) OR (tw:(herpes simplex type-2)) OR (tw:(herpes simplex 2)) OR (tw:(herpes simplex-2)) OR (tw:(herpesvirus type 2)) OR (tw:(herpesvirus type-2)) OR (tw:(herpesvirus 2)) OR (tw:(herpesvirus-2)) OR (tw:(herpes virus type 2)) OR (tw:(herpes virus type-2)) OR (tw:(herpes virus 2)) OR (tw:(herpes virus-2)) OR (tw:(genital herpes)) OR (tw:(herpes genitalis)) OR (tw:(stomatitis herpetic))) AND (pais\_assunto:( "america do sul" OR "brasil" OR "oceania" OR "mexico" OR "argentina" OR "caribe ingles" OR "caribe" OR "chile" OR "america central" OR "colombia" OR "venezuela" OR "jamaica" OR "peru" OR "cuba" OR "costa rica" OR "puerto rico" OR "panama" OR "bolivia" OR "haiti" OR "ecuador" OR "guyana francesa" OR "guyana" OR "barbados" OR "trinidad y tobago" OR "uruguay" OR "honduras" OR "el salvador" OR "guatemala" OR "paraguay" OR "nicaragua" OR "republica dominicana" OR "dominica" OR "bahamas" OR "grenada" OR "martinica" OR "santa lucia" OR "suriname"))

Abbreviations: HSV-2 = Herpes simplex virus type 2.

**Box S1.** Definitions of population type classifications<sup>a</sup>.

1. **General populations** (populations at low risk): these include populations at lower risk of exposure to HSV-2, such as antenatal clinic attendees, blood donors, and pregnant women, among others.
2. **Intermediate-risk populations**: these include populations who presumably have frequent sexual contacts with populations engaging in high sexual risk behavior, and have therefore a higher risk of exposure to HSV-2 than the general population. These comprise prisoners, people who inject drugs, and truck drivers, among others.
3. **High-risk populations**: these include populations at high risk of exposure to HSV-2 as a consequence of specific sexual risk behaviors such as female sex workers, men who have sex with men, male sex workers, and transgender populations, among others.
4. **HIV positive individuals and individuals in HIV discordant couples**: these include populations who are HIV positive or are in a spousal relationship with an HIV positive individual.
5. **STI clinic attendees and symptomatic populations**: these include patients attending STI clinics, or have clinical manifestations related to an STI.
6. **Other populations**: these include populations not satisfying above definitions, or populations with an undetermined risk of acquiring HSV-2 infection such as cervical cancer patients and their spouses.

<sup>a</sup> These population types were selected based on our understanding of HIV/STI epidemiology and the variability of risk of exposure in different population types, as informed by existing literature on HIV and STIs.<sup>2-6</sup>

Abbreviations: HSV-2 Herpes simplex virus type 2, STI = Sexually transmitted infection, HIV = Human immunodeficiency virus.

**Table S3.** Studies reporting HSV-2 seroconversion rate or incidence rate in Latin America and the Caribbean.

| Author, year                                                              | Year(s) of data collection | Country | Original study design | Population characteristics      | HSV-2 serological assay | Sample size | Follow-up duration | Person-years of follow-up | HSV-2 Seroconversion rate (%) | HSV-2 Incidence rate (per 100 person-years) |
|---------------------------------------------------------------------------|----------------------------|---------|-----------------------|---------------------------------|-------------------------|-------------|--------------------|---------------------------|-------------------------------|---------------------------------------------|
| <b>General populations</b>                                                |                            |         |                       |                                 |                         |             |                    |                           |                               |                                             |
| Lupi, 2011 <sup>7</sup>                                                   | 1996-97                    | Brazil  | Cohort                | Blood donors                    | ELISA                   | 110         | 1 year             | -                         | 2.0                           | -                                           |
| Sánchez-Alemán, 2010 <sup>8</sup>                                         | 2001-05                    | Mexico  | Cohort                | Female students                 | ELISA                   | 376         | -                  | 466.2                     | 5.6                           | 4.5                                         |
| Sánchez-Alemán, 2010 <sup>8</sup>                                         | 2001-05                    | Mexico  | Cohort                | Male students                   | ELISA                   | 128         | -                  | 203.0                     | 5.5                           | 4.5                                         |
| <b>Intermediate-risk populations</b>                                      |                            |         |                       |                                 |                         |             |                    |                           |                               |                                             |
| Konda, 2013 <sup>9</sup>                                                  | 2001-03                    | Peru    | RCT                   | Men engaging in risky behaviors | ELISA                   | 1,741       | 2 years            | -                         | 3.4                           | -                                           |
| <b>High-risk populations</b>                                              |                            |         |                       |                                 |                         |             |                    |                           |                               |                                             |
| Castillo, 2015 <sup>10</sup>                                              | 2009-11                    | Peru    | RCT                   | Transgender women               | ELISA                   | 40          | 18 months          | -                         | -                             | 12.2                                        |
| Castillo, 2015 <sup>10</sup>                                              | 2009-11                    | Peru    | RCT                   | MSM                             | ELISA                   | 217         | 18 months          | -                         | -                             | 17.9                                        |
| Konda, 2013 <sup>9</sup>                                                  | 2001-03                    | Peru    | RCT                   | Bisexual men                    | ELISA                   | 311         | 2 years            | -                         | 4.6                           | -                                           |
| Konda, 2013 <sup>9</sup>                                                  | 2001-03                    | Peru    | RCT                   | MSM                             | ELISA                   | 93          | 2 years            | -                         | 13.4                          | -                                           |
| Lupi, 2011 <sup>7</sup>                                                   | 1996-97                    | Brazil  | Cohort                | MSM                             | ELISA                   | 103         | 1 year             | -                         | 8.00                          | -                                           |
| Sanchez, 2009 <sup>11</sup>                                               | 1998-00                    | Peru    | Cohort                | MSM                             | WB                      | 55          | 335 days           | -                         | -                             | 10.4                                        |
| Sanchez, 2009 <sup>11</sup>                                               | 1998-00                    | Peru    | Cohort                | HIV negative MSM                | WB                      | 42          | 335 days           | -                         | 11.9                          | -                                           |
| <b>HIV positive individuals and individuals in HIV discordant couples</b> |                            |         |                       |                                 |                         |             |                    |                           |                               |                                             |
| Sanchez, 2009 <sup>11</sup>                                               | 1998-00                    | Peru    | Cohort                | HIV positive MSM                | WB                      | 13          | 335 days           | -                         | 30.8                          | -                                           |
| Yanez Alvarez, 2011 <sup>12</sup>                                         | 2003-05                    | Mexico  | Cohort                | People living with HIV          | ELISA                   | 131         | 1.5 years          | 174.0                     | 51.1                          | 38.5                                        |

Abbreviations: ELISA = Enzyme-linked immunosorbent assay, HIV = Human immunodeficiency virus, HSV-2 = Herpes simplex virus type 2, MSM = Men who have sex with men, RCT = Randomized controlled trial, WB = Western blot.



**Table S4.** Studies reporting HSV-2 seroprevalence in Latin America and the Caribbean by population type.

| Author, year                        | Year(s) of data collection | Country    | Study site        | Original study design <sup>a</sup> | Sampling method | Population                                          | HSV-2 serological assay | Sample size | HSV-2 seroprevalence (%) |
|-------------------------------------|----------------------------|------------|-------------------|------------------------------------|-----------------|-----------------------------------------------------|-------------------------|-------------|--------------------------|
| <b>General populations</b>          |                            |            |                   |                                    |                 |                                                     |                         |             |                          |
| Abraham, 2003 <sup>13</sup>         | 2000                       | Mexico     | Community         | CS                                 | CRS             | Male students                                       | WB                      | 517         | 4.1                      |
| Abraham, 2003 <sup>13</sup>         | 2000                       | Mexico     | Community         | CS                                 | CRS             | Female students                                     | WB                      | 381         | 7.9                      |
| Alberts, 2013 <sup>14</sup>         | 2005-09                    | Mexico     | Community         | CS                                 | Conv            | Mexican men                                         | ELISA                   | 1,312       | 8.8                      |
| Alberts, 2013 <sup>14</sup>         | 2005-09                    | Brazil     | Community         | CS                                 | Conv            | Brazilian men                                       | ELISA                   | 1,388       | 38.4                     |
| Almeida, 2017 <sup>15</sup>         | 2011-14                    | Brazil     | Outpatient clinic | CS                                 | Conv            | Patients with benign nodules                        | ELISA                   | 83          | 28.0                     |
| Ashley-Morrow, 2004 <sup>16</sup>   | 2000-01                    | Mexico     | Community         | CS                                 | Conv            | Mexican women                                       | WB                      | 94          | 44.6                     |
| Ashley-Morrow, 2004 <sup>16</sup>   | 2000-01                    | Costa Rica | Community         | CS                                 | Conv            | Costa Rican women                                   | WB                      | 94          | 42.5                     |
| Ashley-Morrow, 2004 <sup>16</sup>   | 2000-01                    | Argentina  | Community         | CS                                 | Conv            | Argentinian women                                   | WB                      | 97          | 39.1                     |
| Boulos, 1992 <sup>17</sup>          | 1986-88                    | Haiti      | Community         | CS                                 | Conv            | Pregnant Haitian women                              | ELISA                   | 89          | 54.0                     |
| Cárcamo, 2012 <sup>18</sup>         | 2002                       | Peru       | Community         | CS                                 | CRS             | 18-29 years old women                               | ELISA                   | 1,486       | 13.6                     |
| Cárcamo, 2012 <sup>18</sup>         | 2002                       | Peru       | Community         | CS                                 | CRS             | 18-29 years old men                                 | ELISA                   | 1,176       | 13.5                     |
| Carvalho, 1999 <sup>19</sup>        | 1993-97                    | Brazil     | Outpatient clinic | CS                                 | Conv            | Pregnant women                                      | WB                      | 102         | 22.6                     |
| Carvalho, 1999 <sup>19</sup>        | 1993-97                    | Brazil     | Community         | CS                                 | Conv            | College students                                    | WB                      | 101         | 6.9                      |
| Clark, 2008 <sup>20</sup>           | 2003-04                    | Peru       | Community         | CS                                 | Conv            | Healthy men                                         | ELISA                   | 1,797       | 16.0                     |
| Clemens, 2010 <sup>21</sup>         | 1996-97                    | Brazil     | Community         | CS                                 | CRS             | General population in Brazil                        | ELISA                   | 1,090       | 11.3                     |
| Conde-Glez, 2013 <sup>22</sup>      | 2005-06                    | Mexico     | Community         | CS                                 | MSCS            | General population in Mexico                        | ELISA                   | 3,616       | 9.9                      |
| Conde-Gonzalez, 2003 <sup>23</sup>  | 2000-00                    | Mexico     | Community         | CS                                 | CRS             | Women from the general population                   | WB                      | 730         | 29.3                     |
| Cowan, 2003 <sup>24</sup>           | 1992-00                    | Brazil     | Community         | CS                                 | Conv            | Male blood donors                                   | ELISA                   | 398         | 25.9                     |
| Cowan, 2003 <sup>24</sup>           | 1992-00                    | Brazil     | Community         | CS                                 | Conv            | Female blood donors                                 | ELISA                   | 84          | 42.9                     |
| Cowan, 2003 <sup>24</sup>           | 1992-00                    | Brazil     | Community         | CS                                 | Conv            | Antenatal clinic attendees                          | ELISA                   | 399         | 29.3                     |
| Cowan, 2003 <sup>24</sup>           | 1992-00                    | Brazil     | Community         | CS                                 | Conv            | 1-15 years old children                             | ELISA                   | 697         | 2.4                      |
| Da-Rosa santos, 1996 <sup>25</sup>  | 1994-94                    | Brazil     | Community         | CS                                 | Conv            | Blood donors                                        | ELISA                   | 155         | 29.1                     |
| De Sanjose, 1994 <sup>26</sup>      | 1985-88                    | Colombia   | Community         | CC                                 | RS              | Healthy women                                       | ELISA                   | 237         | 49.8                     |
| Domercant, 2017 <sup>27</sup>       | 2012-12                    | Haiti      | Outpatient clinic | CS                                 | Conv            | Pregnant women                                      | ELISA                   | 784         | 30.5                     |
| Gabster, 2019 <sup>28</sup>         | 2018-18                    | Panama     | Community         | CS                                 | CRS             | Female students                                     | ELISA                   | 273         | 10.2                     |
| Gabster, 2019 <sup>28</sup>         | 2018-18                    | Panama     | Community         | CS                                 | CRS             | Male student                                        | ELISA                   | 286         | 15.7                     |
| Gonzalez, 2006 <sup>29</sup>        | 2004-04                    | Brazil     | Community         | CS                                 | CRS             | Blood donors                                        | ELISA                   | 1,600       | 15.6                     |
| Gonzalez, 2015 <sup>30</sup>        | 2012-13                    | Brazil     | Community         | RCT                                | CRS             | Blood donors in the intervention arm                | ELISA                   | 6,298       | 10.4                     |
| Gonzalez, 2015 <sup>30</sup>        | 2012-13                    | Brazil     | Community         | RCT                                | CRS             | Blood donors in the control arm                     | ELISA                   | 5,569       | 11.1                     |
| Gutierrez, 2006 <sup>31</sup>       | -                          | Mexico     | Community         | CS                                 | MSCS            | Mexican adolescents in poor urban areas             | ELISA                   | 753         | 12.0                     |
| Gutierrez, 2007 <sup>32</sup>       | 2002-03                    | Mexico     | Community         | CS                                 | CRS             | School students                                     | ELISA                   | 1,429       | 18.9                     |
| Herrera-Ortiz, 2013 <sup>33</sup>   | 2006-09                    | Mexico     | Outpatient clinic | CS                                 | Conv            | Pregnant women                                      | ELISA                   | 2,300       | 14.5                     |
| Juarez-Figueroa, 1997 <sup>34</sup> | 1992-92                    | Mexico     | Community         | CS                                 | Conv            | Men getting tested for HIV                          | WB                      | 538         | 28.8                     |
| Konda, 2005 <sup>35</sup>           | 2000-02                    | Peru       | Community         | CS                                 | CRS             | Women from the general population                   | EIA                     | 965         | 20.0                     |
| Konda, 2005 <sup>35</sup>           | 2000-02                    | Peru       | Community         | CS                                 | CRS             | Men from the general population                     | EIA                     | 670         | 7.0                      |
| Lazcano-Ponce, 2001 <sup>36</sup>   | 1994-96                    | Mexico     | Community         | CS                                 | CRS             | Women from Mexico                                   | WB                      | 730         | 29.8                     |
| Levett, 2005 <sup>37</sup>          | -                          | Barbados   | Outpatient clinic | CS                                 | Conv            | Pregnant women                                      | ELISA                   | 122         | 40.2                     |
| Levett, 2005 <sup>37</sup>          | -                          | Barbados   | Community         | CS                                 | Conv            | Blood donors                                        | ELISA                   | 184         | 34.2                     |
| Lupi, 2011 <sup>7</sup>             | 1996-97                    | Brazil     | Community         | Cohort                             | Conv            | Male blood donors                                   | ELISA                   | 155         | 29.0                     |
| Moreira, 2018 <sup>38</sup>         | 2015-16                    | Brazil     | Hospital          | CC                                 | Conv            | Mothers of children without congenital malformation | ELISA                   | 160         | 47.1                     |
| Moreira, 2018 <sup>38</sup>         | 2015-16                    | Brazil     | Hospital          | CC                                 | Conv            | Mothers of children with congenital malformation    | ELISA                   | 32          | 28.1                     |
| Munoz, 1995 <sup>39</sup>           | 1985-88                    | Colombia   | Outpatient clinic | CC                                 | Conv            | Healthy women                                       | ELISA                   | 141         | 67.3                     |
| Munoz, 1995 <sup>39</sup>           | 1985-88                    | Colombia   | Outpatient clinic | CC                                 | Conv            | Healthy men                                         | ELISA                   | 126         | 64.3                     |
| Munoz, 1995 <sup>39</sup>           | 1985-88                    | Colombia   | Outpatient clinic | CC                                 | Conv            | Healthy men                                         | ELISA                   | 73          | 56.2                     |
| Nascimento, 2007 <sup>40</sup>      | 1995-03                    | Brazil     | Outpatient clinic | CS                                 | Conv            | 1-2 years old children                              | WB                      | 249         | 1.6                      |
| Nascimento, 2008 <sup>41</sup>      | 2003-03                    | Brazil     | Community         | CS                                 | Conv            | Blood donors in Brazil                              | ELISA                   | 3,493       | 26.4                     |
| Nascimento, 2009 <sup>42</sup>      | 2003-04                    | Brazil     | Community         | CS                                 | Conv            | Non-American population                             | ELISA                   | 181         | 29.8                     |
| Nascimento, 2009 <sup>42</sup>      | 2003-04                    | Brazil     | Community         | CS                                 | Conv            | Blood donors                                        | ELISA                   | 1,121       | 35.8                     |

|                                       |         |                    |                   |        |      |                                               |                     |       |      |
|---------------------------------------|---------|--------------------|-------------------|--------|------|-----------------------------------------------|---------------------|-------|------|
| Nascimento, 2009 <sup>42</sup>        | 2003-04 | Brazil             | Community         | CS     | Conv | Amerindian population                         | ELISA               | 339   | 7.4  |
| Oberle, 1989 <sup>43</sup>            | 1984-85 | Costa Rica         | Community         | CS     | CRS  | Healthy women                                 | Monoclonal antibody | 766   | 39.4 |
| Patnaik, 2007 <sup>44</sup>           | 1995-97 | Peru               | Hospital          | CS     | Conv | Middle-aged women in Peru                     | WB                  | 171   | 35.7 |
| Patnaik, 2007 <sup>44</sup>           | 1995-97 | Colombia           | Community         | CS     | Conv | Middle-aged women in Colombia                 | WB                  | 65    | 56.9 |
| Patzi-Churqui, 2020 <sup>45</sup>     | 2015-19 | Bolivia            | Community         | CS     | Conv | Healthy women                                 | WB                  | 389   | 53.0 |
| Paz-Bailey, 2009 <sup>46</sup>        | 2006-06 | Honduras           | Community         | CS     | MSCS | Honduran-Garifuna participants                | ELISA               | 791   | 51.1 |
| Rodriguez, 2003 <sup>47</sup>         | 1993-94 | Costa Rica         | Community         | Cohort | CRS  | Women from the Guanacaste cohort              | ELISA               | 1,100 | 38.4 |
| Sanchez, 1996 <sup>48</sup>           | 1991-92 | Peru               | Outpatient clinic | CS     | CRS  | >18 years old women                           | WB                  | 201   | 21.5 |
| Sanchez, 1996 <sup>48</sup>           | 1991-92 | Peru               | Outpatient clinic | CS     | CRS  | >18 years old men                             | WB                  | 281   | 7.7  |
| Sanchez-Aleman, 2005 <sup>49</sup>    | 2000-01 | Mexico             | Community         | CS     | Conv | Students from Mexico                          | WB                  | 340   | 5.9  |
| Sánchez-Alemán, 2008 <sup>50</sup>    | 2001-03 | Mexico             | Community         | CS     | Conv | University students                           | WB                  | 711   | 4.0  |
| Sánchez-Alemán, 2010 <sup>8</sup>     | 2003-05 | Mexico             | Community         | CS     | Conv | University students                           | ELISA               | 592   | 2.2  |
| Sierra, 2011 <sup>51</sup>            | 2002-03 | Colombia           | Community         | CS     | CRS  | Sexual active women                           | ELISA               | 869   | 19.1 |
| Sierra, 2011 <sup>51</sup>            | 2002-03 | Colombia           | Community         | CS     | CRS  | Not sexually active women                     | ELISA               | 57    | 1.7  |
| Smith, 2001 <sup>52</sup>             | 1990-91 | Brazil             | Outpatient clinic | CC     | Conv | Middle-aged women                             | ELISA               | 181   | 42.0 |
| Smith, 2002 <sup>53</sup>             | -       | Peru               | Hospital          | CC     | Conv | Peruvian women                                | WB                  | 171   | 35.7 |
| Smith, 2002 <sup>53</sup>             | -       | Colombia           | Community         | CC     | Conv | Colombian women                               | WB                  | 65    | 56.9 |
| Uribe-Salas, 2009 <sup>54</sup>       | 2000-00 | Mexico             | Community         | CS     | MSCS | Adults in Mexico                              | ELISA               | 6,156 | 17.3 |
| Vaccarella, 2006 <sup>55</sup>        | 1997-00 | Argentina          | Community         | CS     | RS   | Healthy women                                 | ELISA               | 907   | 37.0 |
| Weinberg, 1993 <sup>56</sup>          | 1988-89 | Brazil             | Hospital          | CS     | Conv | Pregnant women of low socioeconomic status    | WB                  | 60    | 46.0 |
| Weinberg, 1993 <sup>56</sup>          | 1988-89 | Brazil             | Hospital          | CS     | Conv | Pregnant women of middle socioeconomic status | WB                  | 94    | 36.0 |
| Zamilpa-Mejía, 2003 <sup>57</sup>     | 1994-95 | Mexico             | Outpatient clinic | CS     | Conv | Women in Mexico city                          | WB                  | 448   | 18.1 |
| Zamilpa-Mejía, 2003 <sup>57</sup>     | 1994-95 | Mexico             | Outpatient clinic | CS     | Conv | Women in Cuernavaca city                      | WB                  | 388   | 28.3 |
| <b>Intermediate-risk populations</b>  |         |                    |                   |        |      |                                               |                     |       |      |
| Benzaken, 2012 <sup>58</sup>          | 2009    | Brazil             | Community         | CS     | Conv | Individuals attending the leisure circuit     | ELISA               | 585   | 62.1 |
| Celentano, 2010 <sup>59</sup>         | 2001-01 | Peru               | Community         | CS     | Conv | Promiscuous women                             | ELISA               | 294   | 43.5 |
| Celentano, 2010 <sup>59</sup>         | 2001-01 | Peru               | Community         | CS     | Conv | Promiscuous men                               | ELISA               | 2,645 | 24.4 |
| Clark, 2009 <sup>60</sup>             | 2003-05 | Peru               | Community         | CS     | CRS  | Women in slums                                | ELISA               | 320   | 40.6 |
| Couture, 2008 <sup>61</sup>           | 2006-07 | Haiti              | Community         | CS     | Conv | Clients of FSWs in Haiti                      | ELISA               | 351   | 22.0 |
| Konda, 2005 <sup>35</sup>             | 2000-02 | Peru               | Community         | CS     | TLS  | Men from a socially marginalized population   | EIA                 | 919   | 20.7 |
| Konda, 2005 <sup>35</sup>             | 2000-02 | Peru               | Community         | CS     | TLS  | Women from a socially marginalized population | EIA                 | 108   | 42.6 |
| Pinho, 2011 <sup>62</sup>             | 2003-05 | Brazil             | Community         | CS     | Conv | Brazilian truck drivers                       | ELISA               | 799   | 26.6 |
| Sabido, 2011 <sup>63</sup>            | 2008-09 | Guatemala          | Community         | CS     | Conv | Clients of FSWs                               | ELISA               | 351   | 3.4  |
| Uribe-Salas, 1995 <sup>64</sup>       | 1993-93 | Mexico             | Community         | CS     | Conv | Men working in bars                           | WB                  | 171   | 32.4 |
| Villaruel-Torrico, 2018 <sup>65</sup> | 2013-13 | Bolivia            | Prison            | CS     | Conv | >16 years old female prisoners                | ELISA               | 219   | 62.6 |
| <b>High-risk populations</b>          |         |                    |                   |        |      |                                               |                     |       |      |
| Brito, 2015 <sup>66</sup>             | 2013    | Dominican Republic | Community         | CS     | SS   | MSM and transgender women                     | ELISA               | 100   | 38.0 |
| Cárcamo, 2012 <sup>18</sup>           | 2002-03 | Peru               | Community         | CS     | CRS  | 18-29 years old FSWs                          | ELISA               | 381   | 67.0 |
| Castillo, 2015 <sup>10</sup>          | 2009-11 | Peru               | Community         | RCT    | SS   | Transgender men                               | ELISA               | 208   | 80.7 |
| Castillo, 2015 <sup>10</sup>          | 2009-11 | Peru               | Community         | RCT    | SS   | 25-35 years old MSM                           | ELISA               | 510   | 65.0 |
| Clark, 2009 <sup>60</sup>             | 2003-05 | Peru               | Community         | CS     | CRS  | Male sex workers                              | ELISA               | 2,424 | 13.0 |
| Clark, 2009 <sup>60</sup>             | 2003-05 | Peru               | Community         | CS     | CRS  | MSM                                           | ELISA               | 541   | 69.0 |
| Conde-Glez, 1999 <sup>67</sup>        | 1992-92 | Mexico             | Outpatient clinic | CS     | Conv | FSWs in Mexico                                | WB                  | 997   | 60.8 |
| Creswell, 2010 <sup>68</sup>          | 2008    | El Salvador        | Community         | CS     | RDS  | FSWs                                          | ELISA               | 663   | 82.6 |
| Da-Rosa santos, 1996 <sup>25</sup>    | 1994-94 | Brazil             | Community         | CS     | Conv | FSWs in Brazil                                | ELISA               | 20    | 75.0 |
| Gotuzzo, 1994 <sup>69</sup>           | 1991-92 | Peru               | Outpatient clinic | CS     | Conv | FSWs in Peru                                  | WB                  | 400   | 82.2 |
| Hakre, 2013 <sup>70</sup>             | 2009-11 | Panama             | Community         | CS     | TLS  | FSWs in Panama                                | ELISA               | 999   | 74.2 |
| Hakre, 2014 <sup>71</sup>             | 2011-12 | Panama             | Community         | CS     | RDS  | MSM in David city                             | ELISA               | 203   | 38.4 |
| Hakre, 2014 <sup>71</sup>             | 2011-12 | Panama             | Community         | CS     | RDS  | MSM in Panama city                            | ELISA               | 305   | 62.6 |
| Hakre, 2014 <sup>71</sup>             | 2011-12 | Panama             | Community         | CS     | RDS  | MSM in Colon                                  | ELISA               | 91    | 72.9 |
| Hernandez, 2011 <sup>72</sup>         | 2009-10 | Nicaragua          | Community         | CS     | RDS  | MSM                                           | ELISA               | 632   | 39.9 |
| Konda, 2005 <sup>35</sup>             | 2000-02 | Peru               | Community         | CS     | TLS  | MSM                                           | EIA                 | 167   | 72.5 |
| Lama, 2006 <sup>73</sup>              | 2002-03 | Peru               | Community         | CS     | SS   | MSM                                           | ELISA               | 3,280 | 46.3 |

|                                                                 |         |             |                   |        |      |                                             |       |       |      |
|-----------------------------------------------------------------|---------|-------------|-------------------|--------|------|---------------------------------------------|-------|-------|------|
| Lupi, 2011 <sup>7</sup>                                         | 1996-97 | Brazil      | Community         | Cohort | Conv | MSM                                         | ELISA | 170   | 39.4 |
| Morales-Miranda, 2008 <sup>74</sup>                             | 2006    | Honduras    | Community         | CS     | RDS  | FSWs                                        | ELISA | 808   | 61.4 |
| Nascimento, 2007 <sup>40</sup>                                  | 1995-03 | Brazil      | Outpatient clinic | CS     | Conv | MSM                                         | WB    | 29    | 45.0 |
| Perez-Brumer, 2013 <sup>75</sup>                                | 2007-07 | Peru        | Outpatient clinic | CS     | Conv | MSM in Lima                                 | ELISA | 560   | 55.4 |
| Perla, 2012 <sup>76</sup>                                       | 2002-03 | Peru        | Community         | CS     | SS   | FSWs in Peru                                | ELISA | 211   | 80.1 |
| Rodrigues, 2009 <sup>77</sup>                                   | 1994-98 | Brazil      | Community         | CS     | Conv | MSM                                         | ELISA | 403   | 45.7 |
| Sanchez, 1998 <sup>78</sup>                                     | 1991-92 | Peru        | Outpatient clinic | CS     | Conv | FSWs registered for routine examination     | WB    | 283   | 82.0 |
| Sanchez, 1998 <sup>78</sup>                                     | 1991-92 | Peru        | Outpatient clinic | CS     | Conv | FSWs not registered for routine examination | WB    | 116   | 82.8 |
| Sanchez, 2007 <sup>79</sup>                                     | 2002-02 | Peru        | Community         | CS     | SS   | MSM                                         | ELISA | 1,328 | 51.0 |
| Sanchez, 2009 <sup>11</sup>                                     | 1998-00 | Peru        | Outpatient clinic | Cohort | SS   | MSM                                         | WB    | 82    | 41.5 |
| Shah, 2014 <sup>80</sup>                                        | 2008-08 | El Salvador | Community         | CS     | RDS  | MSM                                         | ELISA | 703   | 48.1 |
| Shah, 2014 <sup>80</sup>                                        | 2008-08 | El Salvador | Community         | CS     | RDS  | FSWs                                        | ELISA | 768   | 82.3 |
| Silva-Santisteban, 2012 <sup>81</sup>                           | 2009-09 | Peru        | Community         | CS     | RDS  | Transgender women in Lima                   | ELISA | 436   | 79.4 |
| Soto, 2007 <sup>82</sup>                                        | 2001-02 | El Salvador | Outpatient clinic | CS     | MSCS | FSWs from El Salvador                       | ELISA | 136   | 95.7 |
| Soto, 2007 <sup>82</sup>                                        | 2001-02 | El Salvador | Community         | CS     | TLS  | MSM from El Salvador                        | ELISA | 81    | 56.5 |
| Soto, 2007 <sup>82</sup>                                        | 2001-02 | Guatemala   | Outpatient clinic | CS     | MSCS | FSWs from Guatemala                         | ELISA | 589   | 88.6 |
| Soto, 2007 <sup>82</sup>                                        | 2001-02 | Guatemala   | Community         | CS     | TLS  | MSM from Guatemala                          | ELISA | 362   | 43.3 |
| Soto, 2007 <sup>82</sup>                                        | 2001-02 | Honduras    | Outpatient clinic | CS     | MSCS | FSWs from Honduras                          | ELISA | 457   | 91.1 |
| Soto, 2007 <sup>82</sup>                                        | 2001-02 | Honduras    | Community         | CS     | TLS  | MSM from Honduras                           | ELISA | 316   | 50.9 |
| Soto, 2007 <sup>82</sup>                                        | 2001-02 | Nicaragua   | Outpatient clinic | CS     | MSCS | FSWs from Nicaragua                         | ELISA | 553   | 82.1 |
| Soto, 2007 <sup>82</sup>                                        | 2001-02 | Nicaragua   | Community         | CS     | TLS  | MSM from Nicaragua                          | ELISA | 269   | 53.8 |
| Soto, 2007 <sup>82</sup>                                        | 2001-02 | Panama      | Outpatient clinic | CS     | MSCS | FSWs from Panama                            | ELISA | 560   | 73.0 |
| Soto, 2007 <sup>82</sup>                                        | 2001-02 | Panama      | Community         | CS     | TLS  | MSM from Panama                             | ELISA | 515   | 44.3 |
| Uribe-Salas, 1999 <sup>83</sup>                                 | 1992-93 | Mexico      | Community         | CS     | TLS  | FSWs in Mexico city                         | WB    | 757   | 65.1 |
| Uribe-Salas, 2003 <sup>84</sup>                                 | 1998-98 | Mexico      | Community         | CS     | Conv | FSWs in Mexico                              | WB    | 468   | 85.7 |
| Zunt, 2006 <sup>85</sup>                                        | -       | Peru        | Community         | CS     | SS   | HTLV-II seronegative MSM                    | ELISA | 2,621 | 44.9 |
| Zunt, 2006 <sup>85</sup>                                        | -       | Peru        | Community         | CS     | SS   | HTLV-II seropositive MSM                    | ELISA | 33    | 93.9 |
| <b>STI clinic attendees and symptomatic populations</b>         |         |             |                   |        |      |                                             |       |       |      |
| Carvalho, 1999 <sup>19</sup>                                    | 1993-97 | Brazil      | Outpatient clinic | CS     | Conv | STI clinic attendees                        | WB    | 96    | 53.1 |
| Martinez, 2005 <sup>86</sup>                                    | 2003-03 | Chile       | Outpatient clinic | CS     | Conv | STI clinic attendees                        | ELISA | 200   | 43.0 |
| Nascimento, 2007 <sup>40</sup>                                  | 1995-03 | Brazil      | Outpatient clinic | CS     | Conv | STI clinic attendees                        | WB    | 137   | 51.0 |
| <b>HIV positive populations and HIV sero-discordant couples</b> |         |             |                   |        |      |                                             |       |       |      |
| Batista, 2009 <sup>87</sup>                                     | 2002    | Brazil      | Community         | Cohort | Conv | HIV positive patients                       | ELISA | 145   | 61.4 |
| Boulos, 1992 <sup>17</sup>                                      | 1986-88 | Haiti       | Community         | CS     | Conv | HIV positive pregnant Haitian women         | ELISA | 95    | 88.0 |
| Da-Rosa Santos, 1996 <sup>25</sup>                              | 1994-94 | Brazil      | Community         | CS     | Conv | HIV positive patients                       | ELISA | 85    | 73.0 |
| Domercant, 2017 <sup>27</sup>                                   | 2012-12 | Haiti       | Outpatient clinic | CS     | Conv | HIV positive women                          | ELISA | 144   | 71.5 |
| Levett, 2005 <sup>37</sup>                                      | -       | Barbados    | Outpatient clinic | CS     | Conv | HIV positive adults                         | ELISA | 120   | 77.5 |
| Lima, 2018 <sup>88</sup>                                        | 2005-08 | Brazil      | Outpatient clinic | Cohort | Conv | Pregnant women with HIV                     | ELISA | 134   | 59.7 |
| Nascimento, 2007 <sup>40</sup>                                  | 1995-03 | Brazil      | Outpatient clinic | CS     | Conv | HIV patients with GUD                       | WB    | 30    | 87.0 |
| Nascimento, 2007 <sup>40</sup>                                  | 1995-03 | Brazil      | Outpatient clinic | CS     | Conv | HIV positive patients                       | WB    | 40    | 62.0 |
| Paz-Bailey, 2012a <sup>89</sup>                                 | 2006-06 | Honduras    | Outpatient clinic | CS     | Conv | HIV positive patients                       | ELISA | 810   | 77.9 |
| Paz-Bailey, 2012b <sup>90</sup>                                 | 2008-08 | El Salvador | Outpatient clinic | CS     | Conv | HIV positive patients                       | ELISA | 760   | 84.5 |
| Sanchez, 2009 <sup>11</sup>                                     | 1998-00 | Peru        | Outpatient clinic | Cohort | SS   | MSM who seroconverted to HIV                | WB    | 26    | 42.3 |
| Santos, 2006 <sup>91</sup>                                      | 2001-02 | Brazil      | Outpatient clinic | CS     | Conv | HIV positive patients                       | ELISA | 150   | 52.0 |
| Yanez Alvarez, 2011 <sup>12</sup>                               | 2003-05 | Mexico      | Outpatient clinic | Cohort | Conv | HIV positive patients                       | ELISA | 301   | 48.5 |
| <b>Other populations<sup>b</sup></b>                            |         |             |                   |        |      |                                             |       |       |      |
| Almeida, 2017 <sup>15</sup>                                     | 2011-14 | Brazil      | Outpatient clinic | CS     | Conv | Patients with malignant nodules             | ELISA | 100   | 18.0 |
| Bahena-Roman, 2020 <sup>92</sup>                                | 2008-11 | Mexico      | Outpatient clinic | CS     | Conv | Women with cervical related diseases        | ELISA | 644   | 25.0 |
| Boulos, 1992 <sup>17</sup>                                      | 1986-88 | Haiti       | Community         | CS     | Conv | HTLV-I seropositive pregnant Haitian women  | ELISA | 45    | 82.0 |
| Calderon, 2018 <sup>93</sup>                                    | 2014-15 | Peru        | Outpatient clinic | CS     | Conv | Women with cancer                           | ELISA | 44    | 36.4 |
| Castle, 2003 <sup>94</sup>                                      | 1993-97 | Jamaica     | Outpatient clinic | CC     | Conv | Women with low grade cervical neoplasia     | ELISA | 201   | 60.9 |
| Castle, 2003 <sup>94</sup>                                      | 1993-97 | Jamaica     | Outpatient clinic | CC     | Conv | Women with cervical neoplasia grade 2       | ELISA | 117   | 61.6 |
| Castle, 2003 <sup>94</sup>                                      | 1993-97 | Jamaica     | Outpatient clinic | CC     | Conv | Women with cervical neoplasia grade 3       | ELISA | 92    | 73.5 |
| Conde-Gonzalez, 2003 <sup>23</sup>                              | 2000-00 | Mexico      | Community         | CS     | CRS  | Women with cervical cancer                  | WB    | 408   | 46.8 |
| Conde-Gonzalez, 2003 <sup>23</sup>                              | 2000-00 | Mexico      | Community         | CS     | CRS  | Women with cancer                           | WB    | 128   | 22.6 |

|                                |         |            |                   |    |      |                                               |       |     |      |
|--------------------------------|---------|------------|-------------------|----|------|-----------------------------------------------|-------|-----|------|
| De Sanjose, 1994 <sup>26</sup> | 1985-88 | Colombia   | Outpatient clinic | CC | Conv | Women with CIN III                            | ELISA | 243 | 60.8 |
| DeBritton, 1993 <sup>35</sup>  | 1986-87 | Panama     | Hospital          | CS | Conv | Women with cervical cancer                    | WB    | 189 | 57.0 |
| Munoz, 1995 <sup>39</sup>      | 1985-88 | Colombia   | Outpatient clinic | CC | Conv | Women with invasive cancer                    | ELISA | 121 | 75.2 |
| Munoz, 1995 <sup>39</sup>      | 1985-88 | Colombia   | Outpatient clinic | CC | Conv | Husbands of women with invasive cancer        | ELISA | 52  | 59.6 |
| Munoz, 1995 <sup>39</sup>      | 1985-88 | Colombia   | Outpatient clinic | CC | Conv | Husbands of women with CIN III                | ELISA | 120 | 60.8 |
| Smith, 2002 <sup>53</sup>      | -       | Brazil     | Outpatient clinic | CC | Conv | Brazilian women with squamous-cell carcinoma  | WB    | 145 | 55.2 |
| Smith, 2002 <sup>53</sup>      | -       | Brazil     | Outpatient clinic | CC | Conv | Brazilian women with adeno- or adenocarcinoma | WB    | 16  | 43.8 |
| Smith, 2002 <sup>53</sup>      | -       | Colombia   | Outpatient clinic | CC | Conv | Colombian women with squamous-cell carcinoma  | WB    | 78  | 61.5 |
| Smith, 2002 <sup>53</sup>      | -       | Peru       | Outpatient clinic | CC | Conv | Peruvian women with squamous-cell carcinoma   | WB    | 166 | 56.6 |
| Smith, 2002 <sup>53</sup>      | -       | Peru       | Outpatient clinic | CC | Conv | Peruvian women with adeno- or adenocarcinoma  | WB    | 24  | 66.7 |
| Stone, 1995 <sup>96</sup>      | 1982-84 | Costa Rica | Community         | CC | Conv | Women with cervical carcinoma                 | WB    | 415 | 54.7 |
| Stone, 1995 <sup>96</sup>      | 1982-84 | Costa Rica | Community         | CC | Conv | Women with invasive cervical cancer           | WB    | 149 | 57.8 |

<sup>a</sup>The reported study design is the original study design (case control, cross sectional, cohort, or randomized controlled trial). The included seroprevalence measures are those for the baseline measures at the beginning of the study.

<sup>b</sup>Other populations include populations with an undetermined risk of acquiring HSV-2 infection such as patients with cervical cancer or their spouses.

Abbreviations: CC = Case control, Conv = Convenience, CIN = Cervical intraepithelial neoplasia, CRS = Cluster random sampling, CS = Cross sectional, EIA = Enzyme immunosorbent assay, ELISA = Enzyme-linked immunosorbent assay, FSWs = Female sex workers, GUD = Genital ulcer disease, HIV = Human immunodeficiency virus, HSV-2 = Herpes simplex virus type 2, HTLV = Human T- cell leukemia virus, MSCS = Multiple stage cluster sampling, MSM = Men who have sex with men, RCT = Randomized controlled trial, RDS = Response driven sampling, RS = Random sampling, SS = Snowball sampling, STI = Sexually transmitted infection, TLS = Time-location sampling, VCT = Voluntary counselling and testing, WB = Western blot.

**Figure S1.** Forest plots presenting the outcomes of the pooled mean herpes simplex virus type 2 (HSV-2) seroprevalence among the different at risk populations in Latin America and the Caribbean.

A) General populations

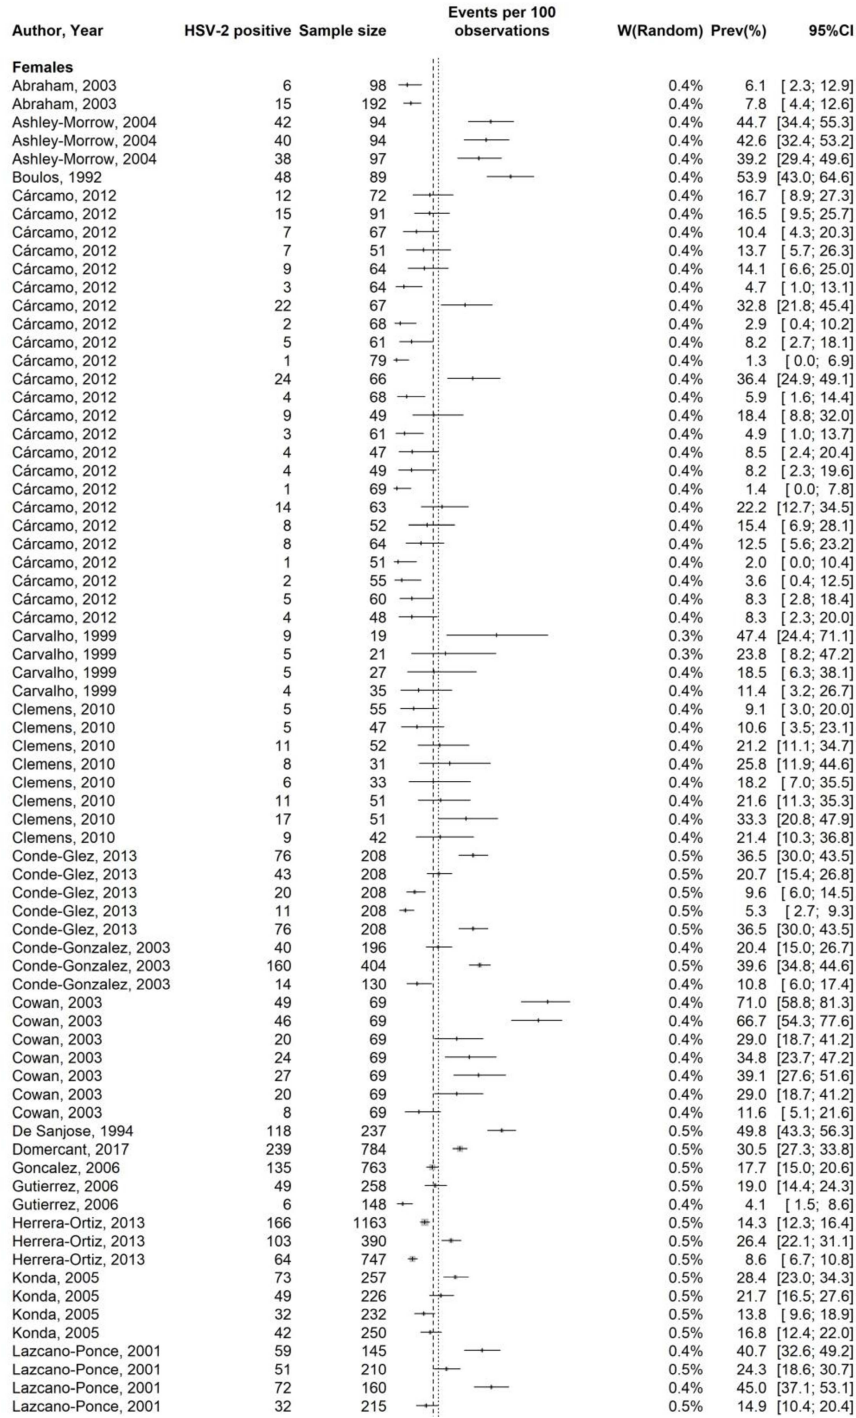

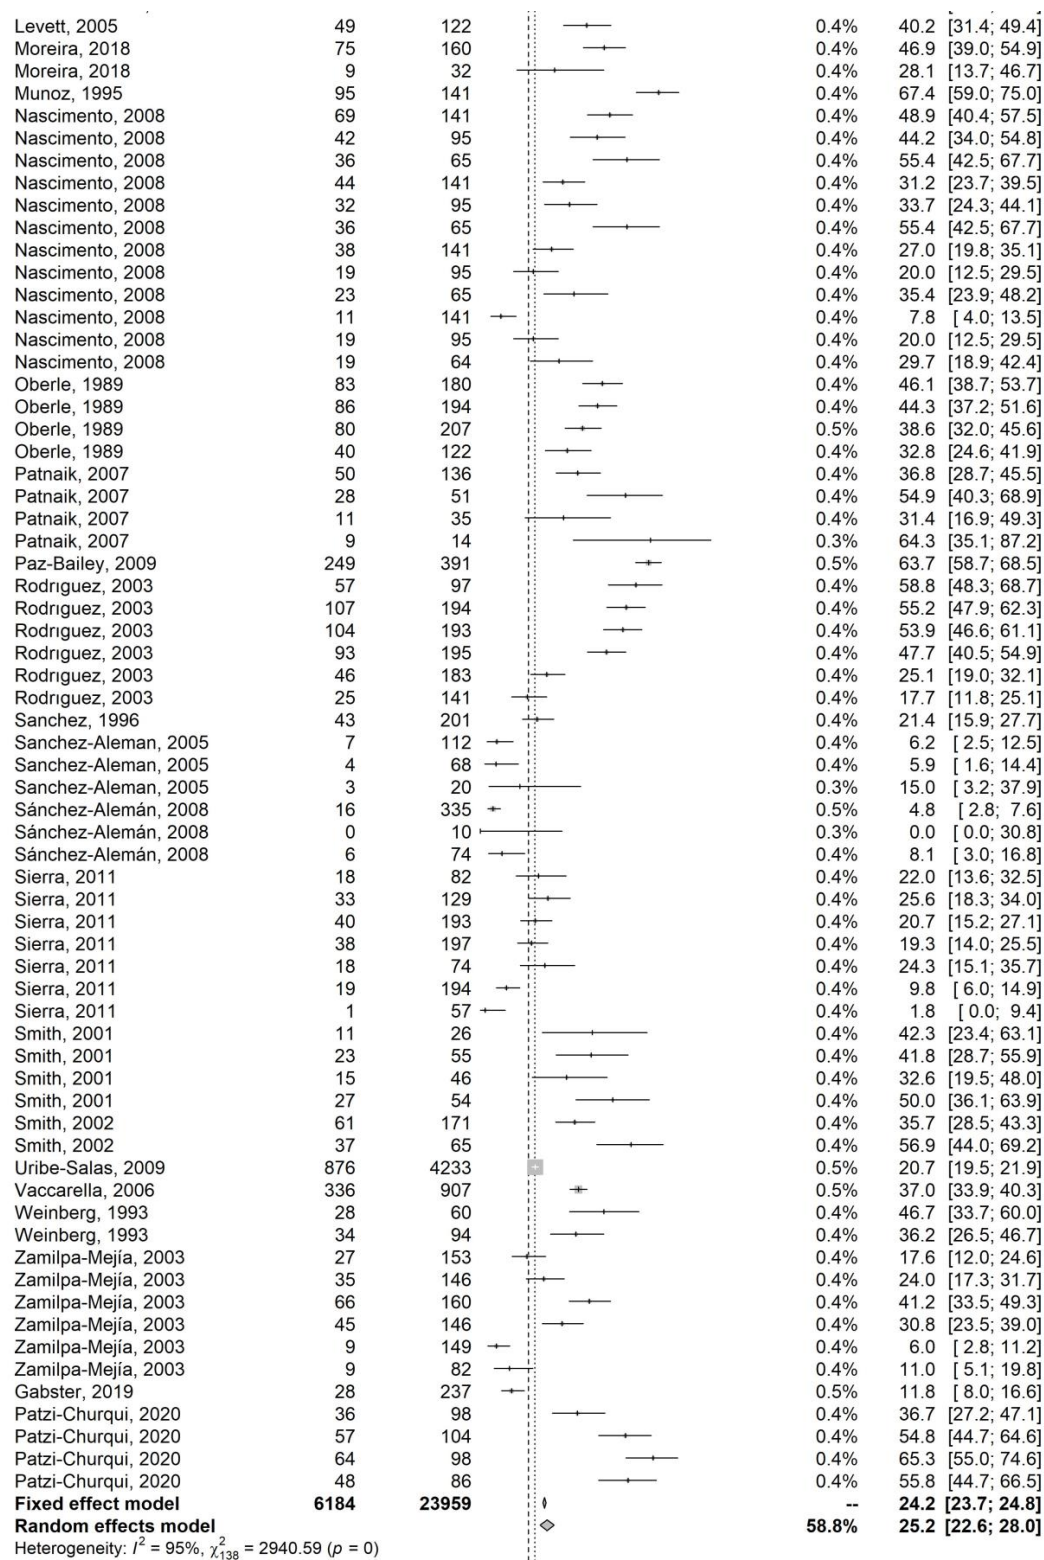

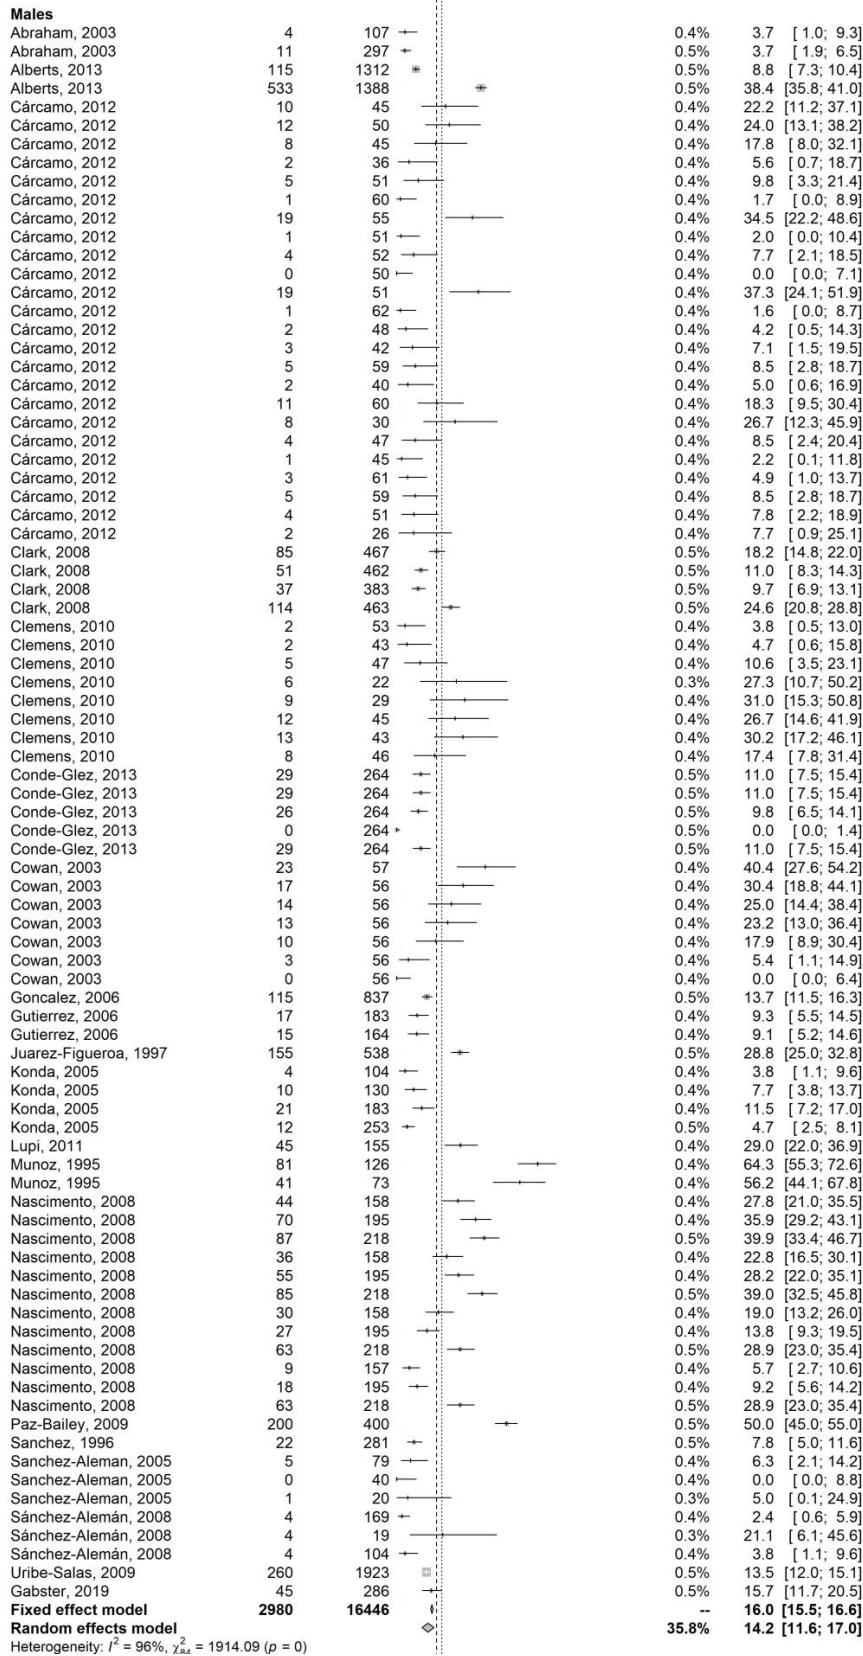

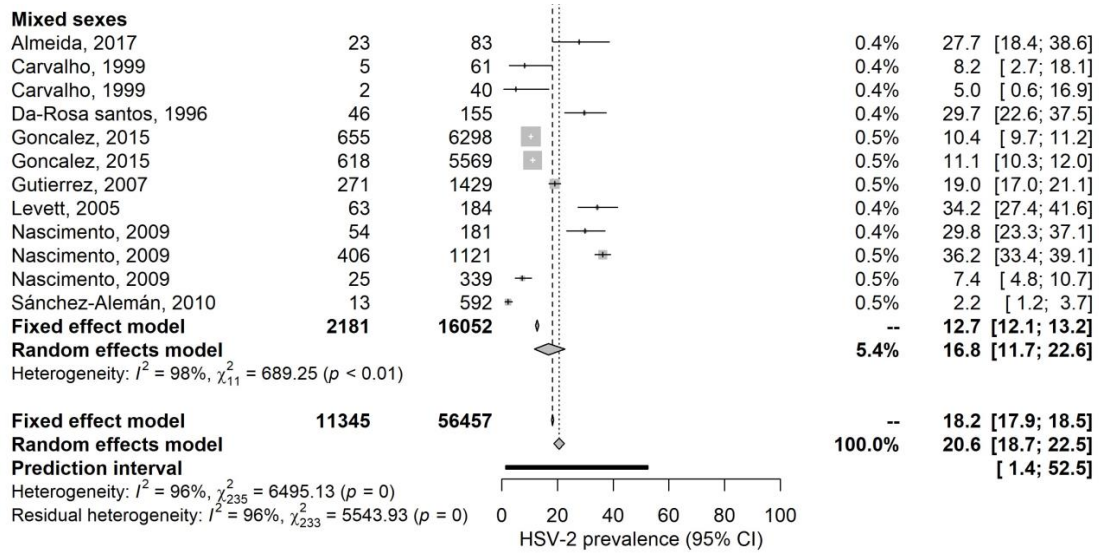

Abbreviations: CI = Confidence interval, HSV-2 = Herpes simplex virus type 2.



## B) Intermediate-risk populations

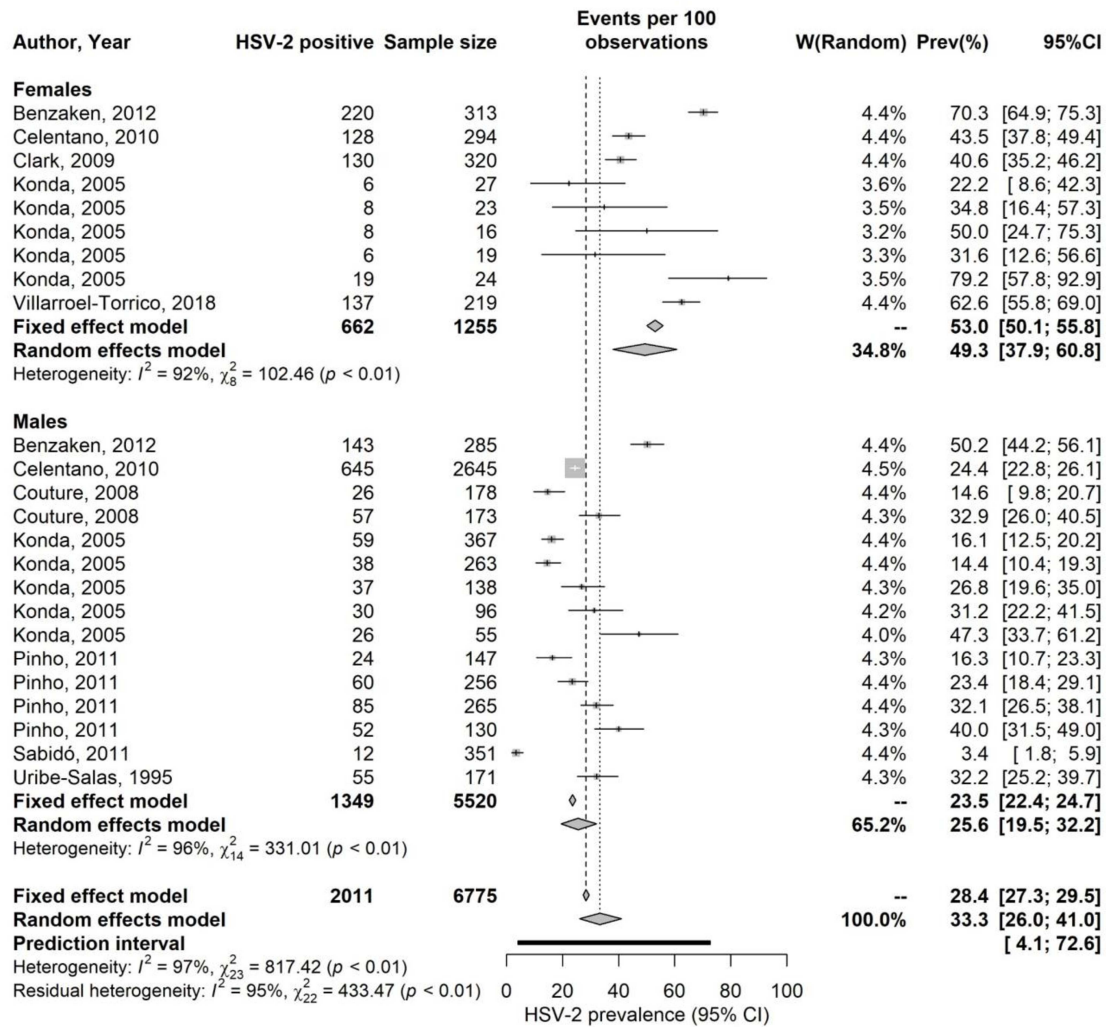

C) High-risk populations

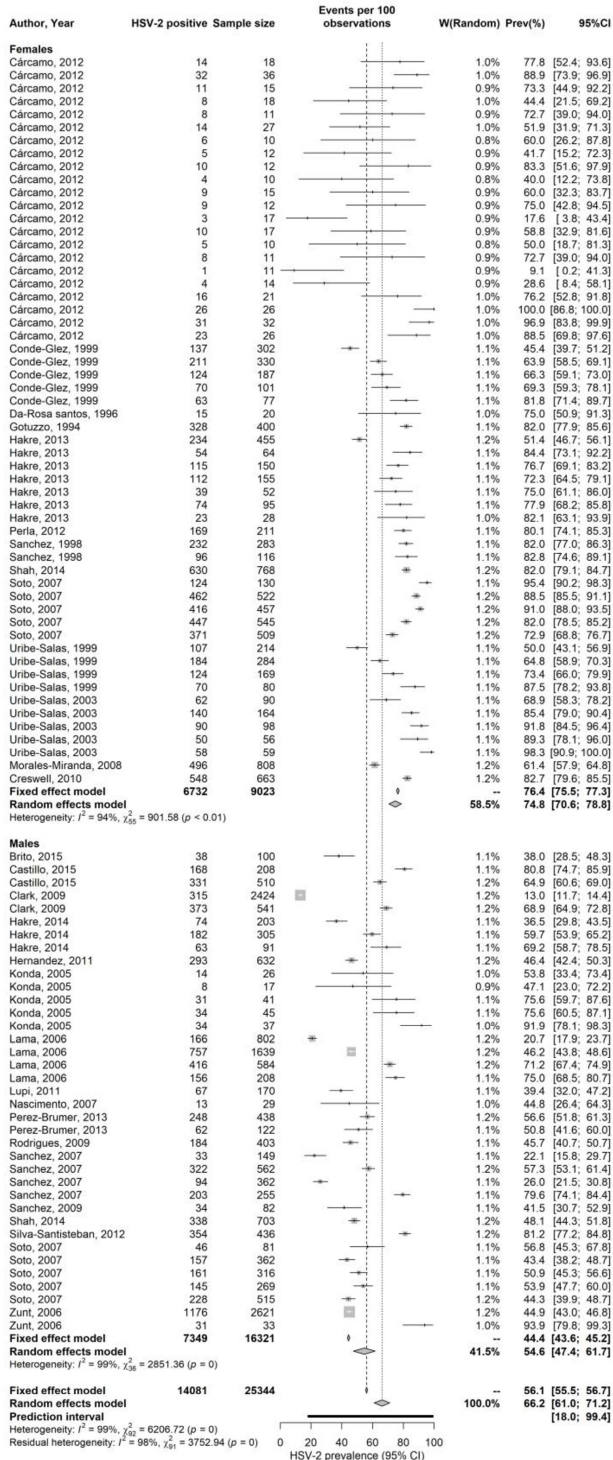

Abbreviations: CI = Confidence interval, HSV-2 = Herpes simplex virus type 2.

## D) STI clinic attendees and symptomatic populations (mixed women and men)

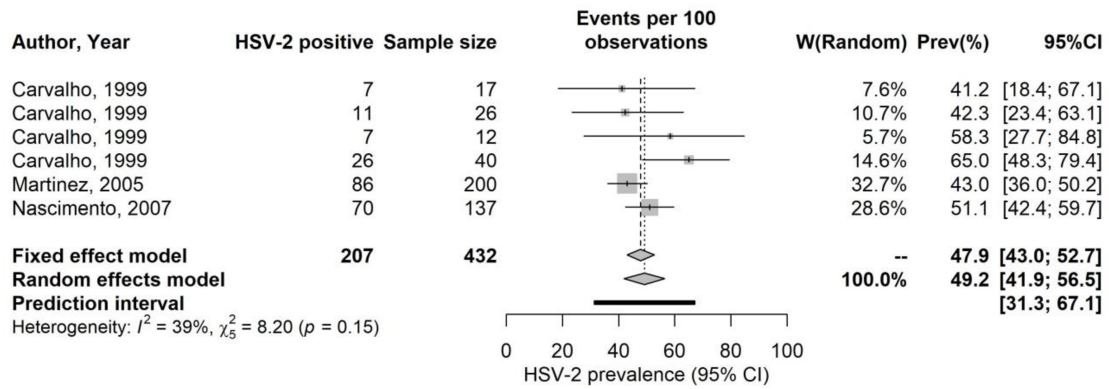

Abbreviations: CI = Confidence interval, HSV-2 = Herpes simplex virus type 2, STI = Sexually transmitted infection.

## F) HIV positive individuals and individuals in HIV discordant couples

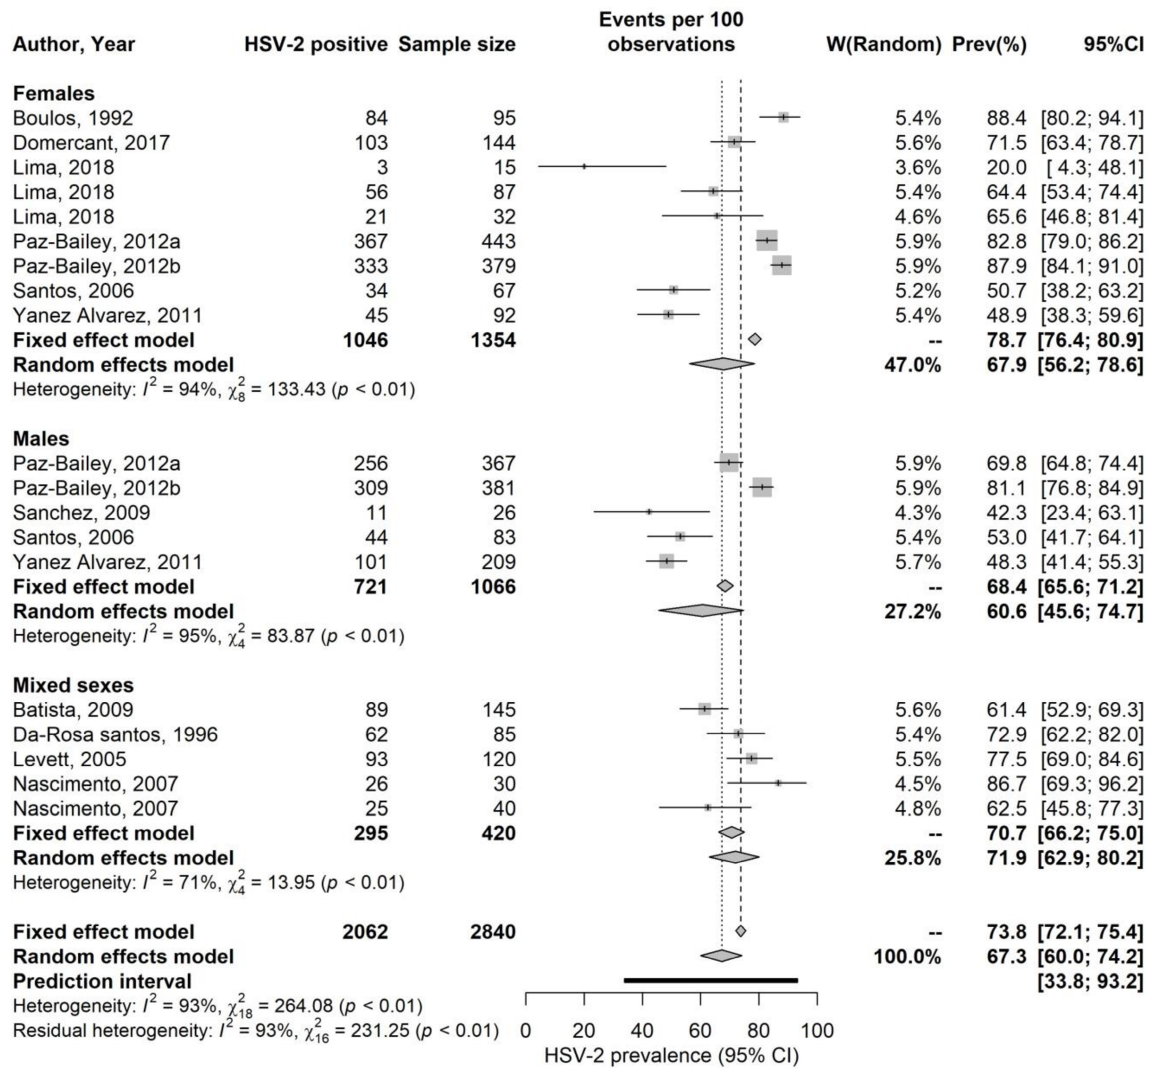

Abbreviations: CI = Confidence interval, HSV-2 = Herpes simplex virus type 2, HIV = Human immunodeficiency virus.

## G) Other populations

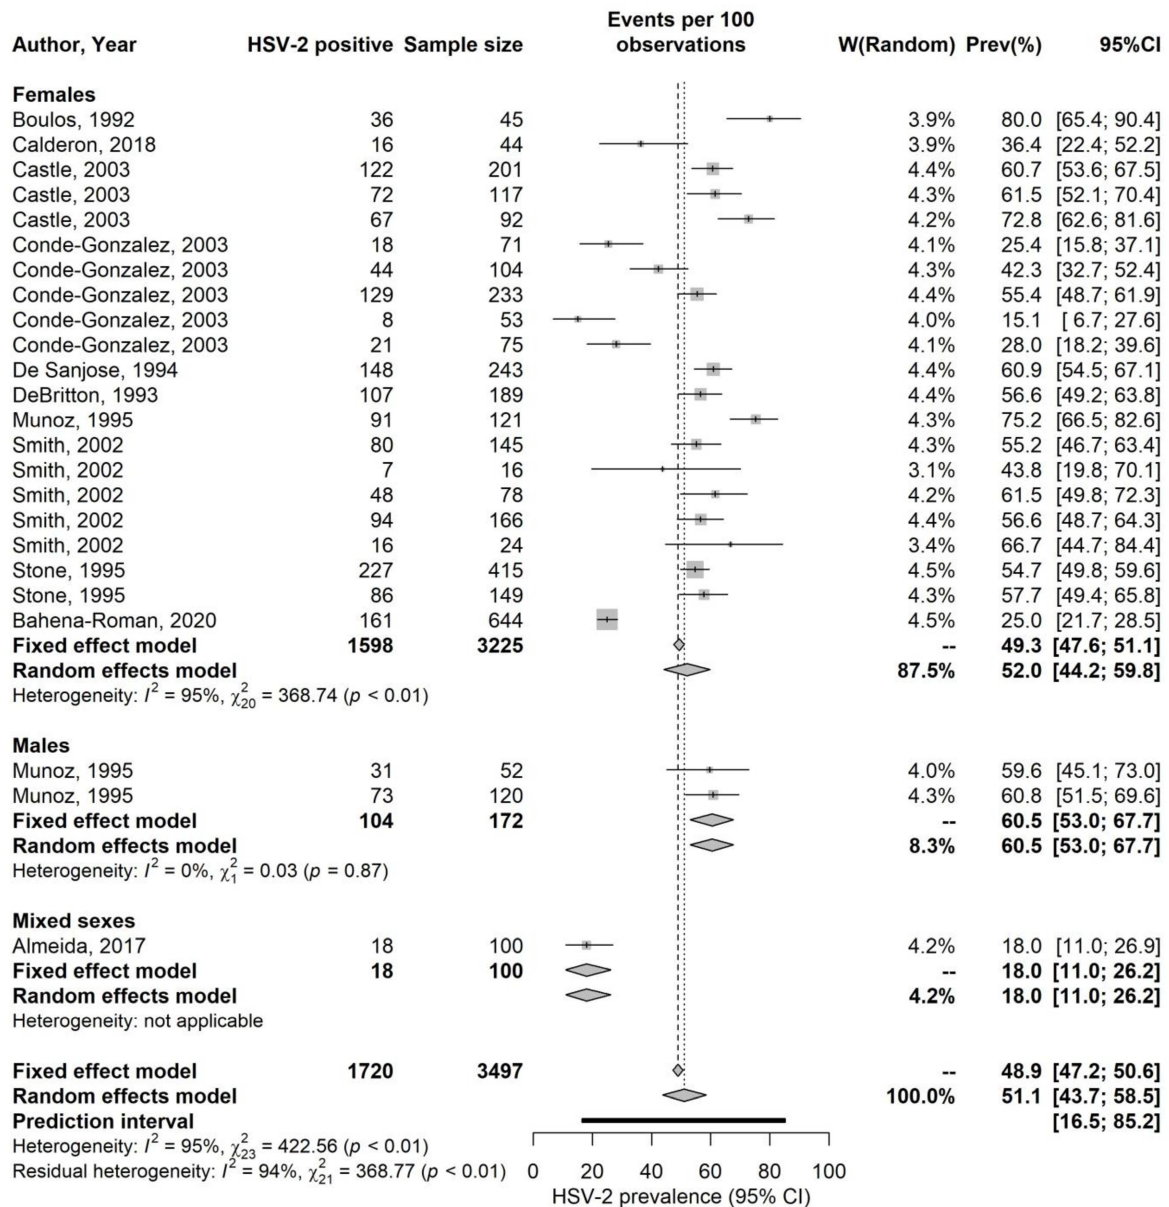

Abbreviations: CI = Confidence interval, HSV-2 = Herpes simplex virus type 2.

**Table S5.** Univariable and multivariable meta-regression analyses for HSV-2 seroprevalence among the different at risk populations in Latin America and the Caribbean using each of country's income and country *instead* of subregion in the multivariable meta-regression.

|                                   |                          |                                                                    | Outcome measures |                  | Sample size      |        | Univariable analysis |                  |                  |                  | Multivariable analysis |                  |                             |        |                      |   |                      |   |                      |   |
|-----------------------------------|--------------------------|--------------------------------------------------------------------|------------------|------------------|------------------|--------|----------------------|------------------|------------------|------------------|------------------------|------------------|-----------------------------|--------|----------------------|---|----------------------|---|----------------------|---|
|                                   |                          |                                                                    | Total n          |                  | Total N          |        | RR (95% CI)          |                  | p-value          |                  | LR test p-value        |                  | Adjusted R <sup>2</sup> (%) |        | Model 1 <sup>a</sup> |   | Model 2 <sup>b</sup> |   | Model 3 <sup>c</sup> |   |
|                                   |                          |                                                                    |                  |                  |                  |        |                      |                  |                  |                  |                        |                  |                             |        | ARR (95% CI)         |   | p-value              |   | ARR (95% CI)         |   |
| Population characteristics        | Population type          | General populations                                                | 236              | 56,457           | 1.00             | -      | <0.001               | 45.98            | 1.00             | -                | 1.00                   | -                | 1.00                        | -      | 1.00                 | - | 1.00                 | - | 1.00                 | - |
|                                   |                          | Intermediate-risk populations                                      | 24               | 6,775            | 1.52 (1.16-2.00) | 0.002  |                      |                  | 1.55 (1.22-1.96) | <0.001           | 1.49 (1.18-1.87)       | 0.001            | 1.58 (1.26-1.97)            | <0.001 |                      |   |                      |   |                      |   |
|                                   |                          | High-risk populations                                              | 93               | 25,344           | 3.09 (2.64-3.61) | <0.001 |                      |                  | 3.09 (2.67-3.57) | <0.001           | 2.81 (2.44-3.23)       | <0.001           | 3.08 (2.66-3.55)            | <0.001 |                      |   |                      |   |                      |   |
|                                   |                          | STI clinic attendees and symptomatic populations                   | 6                | 432              | 2.49 (1.47-4.22) | 0.001  |                      |                  | 2.40 (1.48-3.90) | <0.001           | 2.15 (1.34-3.45)       | 0.002            | 2.18 (1.38-3.42)            | 0.001  |                      |   |                      |   |                      |   |
|                                   |                          | HIV positive individuals and individuals in HIV discordant couples | 19               | 2,840            | 3.21 (2.38-4.32) | <0.001 |                      |                  | 3.06 (2.37-3.95) | <0.001           | 2.59 (2.02-3.33)       | <0.001           | 2.77 (2.18-3.51)            | <0.001 |                      |   |                      |   |                      |   |
|                                   |                          | Other populations <sup>d</sup>                                     | 24               | 3,497            | 2.42 (1.85-3.16) | <0.001 |                      |                  | 1.56 (1.24-1.97) | <0.001           | 1.55 (1.24-1.94)       | <0.001           | 1.51 (1.22-1.88)            | <0.001 |                      |   |                      |   |                      |   |
|                                   | Age group                | <20 years                                                          | 35               | 6,538            | 1.00             | -      | <0.001               | 10.26            | 1.00             | -                | 1.00                   | -                | 1.00                        | -      |                      |   |                      |   |                      |   |
|                                   |                          | 20-30 years                                                        | 47               | 7,751            | 2.05 (1.40-3.00) | <0.001 |                      |                  | 1.63 (1.27-2.09) | <0.001           | 1.70 (1.34-2.17)       | <0.001           | 1.63 (1.29-2.05)            | <0.001 |                      |   |                      |   |                      |   |
|                                   |                          | 30-40 years                                                        | 22               | 2,933            | 2.58 (1.64-4.04) | <0.001 |                      |                  | 2.24 (1.68-2.99) | <0.001           | 2.29 (1.72-3.03)       | <0.001           | 2.11 (1.61-2.77)            | <0.001 |                      |   |                      |   |                      |   |
|                                   |                          | >40 years                                                          | 39               | 5,940            | 2.84 (1.92-4.18) | <0.001 |                      |                  | 3.22 (2.50-4.14) | <0.001           | 3.20 (2.50-4.09)       | <0.001           | 2.92 (2.30-3.71)            | <0.001 |                      |   |                      |   |                      |   |
|                                   |                          | Mixed ages                                                         | 259              | 72,183           | 2.49 (1.82-3.41) | <0.001 |                      |                  | 1.79 (1.44-2.21) | <0.001           | 1.72 (1.40-2.12)       | <0.001           | 1.68 (1.37-2.07)            | <0.001 |                      |   |                      |   |                      |   |
|                                   | Sex                      | Women                                                              | 234              | 38,816           | 1.00             | -      | 0.001                | 4.82             | 1.00             | -                | 1.00                   | -                | 1.00                        | -      |                      |   |                      |   |                      |   |
|                                   |                          | Men                                                                | 144              | 39,525           | 0.67 (0.56-0.80) | <0.001 |                      |                  | 0.68 (0.60-0.76) | <0.001           | 0.70 (0.62-0.78)       | <0.001           | 0.68 (0.61-0.76)            | <0.001 |                      |   |                      |   |                      |   |
|                                   |                          | Mixed sexes                                                        | 24               | 17,004           | 0.81 (0.57-1.16) | 0.267  |                      |                  | 0.59 (0.46-0.77) | <0.001           | 0.65 (0.50-0.83)       | 0.001            | 0.62 (0.48-0.80)            | <0.001 |                      |   |                      |   |                      |   |
|                                   | Countries                | Brazil                                                             | 106              | 25,766           | 1.00             | -      | <0.001               | 12.58            | -                | -                | -                      | -                | 1.00                        | -      |                      |   |                      |   |                      |   |
|                                   |                          | Colombia                                                           | 19               | 2,247            | 1.36 (0.91-2.01) | 0.125  |                      |                  | -                | -                | -                      | -                | 1.20 (0.93-1.55)            | 0.156  |                      |   |                      |   |                      |   |
|                                   |                          | Costa Rica                                                         | 13               | 2,364            | 1.46 (0.92-2.30) | 0.102  |                      |                  | -                | -                | -                      | -                | 1.23 (0.92-1.64)            | 0.157  |                      |   |                      |   |                      |   |
|                                   |                          | Mexico                                                             | 76               | 23,437           | 0.71 (0.56-0.91) | 0.008  |                      |                  | -                | -                | -                      | -                | 0.66 (0.56-0.78)            | <0.001 |                      |   |                      |   |                      |   |
|                                   |                          | Panama                                                             | 15               | 3,334            | 1.81 (1.18-2.78) | 0.006  |                      |                  | -                | -                | -                      | -                | 1.10 (0.82-1.47)            | 0.506  |                      |   |                      |   |                      |   |
|                                   |                          | Peru                                                               | 131              | 24,976           | 0.92 (0.74-1.14) | 0.476  |                      |                  | -                | -                | -                      | -                | 0.87 (0.73-1.02)            | 0.096  |                      |   |                      |   |                      |   |
|                                   |                          | Other <sup>e</sup>                                                 | 42               | 13,221           | 1.84 (1.39-2.45) | <0.001 |                      |                  | -                | -                | -                      | -                | 1.20 (0.99-1.46)            | 0.050  |                      |   |                      |   |                      |   |
|                                   | Subregions               | Central America                                                    | 124              | 38,103           | 1.00             | -      | 0.065                | 0.82             | 1.00             | -                | -                      | -                | -                           | -      |                      |   |                      |   |                      |   |
|                                   |                          | South America                                                      | 264              | 54,798           | 0.95 (0.79-1.14) | 0.606  |                      |                  | 1.13 (1.00-1.27) | 0.047            | -                      | -                | -                           | -      |                      |   |                      |   |                      |   |
|                                   |                          | Caribbean                                                          | 14               | 2,444            | 1.62 (1.02-2.58) | 0.040  |                      |                  | 1.17 (0.87-1.57) | 0.281            | -                      | -                | -                           | -      |                      |   |                      |   |                      |   |
| Country's income                  | LIC and LMIC             | 29                                                                 | 9,846            | 1.00             | -                | <0.001 | 9.07                 | -                | -                | 1.00             | -                      | -                | -                           |        |                      |   |                      |   |                      |   |
|                                   | UMIC                     | 354                                                                | 81,539           | 0.45 (0.33-0.62) | <0.001           |        |                      | -                | -                | 0.65 (0.54-0.78) | <0.001                 | -                | -                           |        |                      |   |                      |   |                      |   |
|                                   | HIC                      | 19                                                                 | 3,960            | 0.86 (0.54-1.36) | 0.528            |        |                      | -                | -                | 0.83 (0.63-1.11) | 0.220                  | -                | -                           |        |                      |   |                      |   |                      |   |
| Study methodology characteristics | Assay type               | Western Blot                                                       | 94               | 11,898           | 1.00             | -      | 0.432                | 0.00             | -                | -                | -                      | -                | -                           |        |                      |   |                      |   |                      |   |
|                                   |                          | ELISA                                                              | 304              | 82,744           | 0.89 (0.73-1.09) | 0.280  |                      |                  | -                | -                | -                      | -                | -                           |        |                      |   |                      |   |                      |   |
|                                   |                          | Monoclonal antibody                                                | 4                | 703              | 1.24 (0.53-2.87) | 0.614  |                      |                  | -                | -                | -                      | -                | -                           |        |                      |   |                      |   |                      |   |
|                                   | Sample size <sup>f</sup> | <200                                                               | 81               | 7,542            | 1.00             | -      | <0.001               | 7.27             | 1.00             | -                | 1.00                   | -                | 1.00                        | -      |                      |   |                      |   |                      |   |
|                                   |                          | >200                                                               | 321              | 87,803           | 0.58 (0.47-0.71) | <0.001 |                      |                  | 0.75 (0.64-0.87) | <0.001           | 0.75 (0.64-0.86)       | <0.001           | 0.82 (0.71-0.95)            | 0.010  |                      |   |                      |   |                      |   |
|                                   | Sampling method          | Probability based                                                  | 151              | 47,471           | 1.00             | -      | <0.001               | 18.05            | 1.00             | -                | 1.00                   | -                | 1.00                        | -      |                      |   |                      |   |                      |   |
|                                   |                          | Non-probability based                                              | 251              | 47,874           | 2.08 (1.76-2.44) | <0.001 |                      |                  | 1.16 (1.00-1.35) | 0.037            | 1.24 (1.08-1.42)       | 0.002            | 1.18 (1.03-1.35)            | 0.013  |                      |   |                      |   |                      |   |
|                                   | Response rate            | ≥80%                                                               | 194              | 48,220           | 1.00             | -      | 0.002                | 5.52             | 1.00             | -                | 1.00                   | -                | 1.00                        | -      |                      |   |                      |   |                      |   |
| <80%                              |                          | 32                                                                 | 6,062            | 0.59 (0.42-0.82) | 0.002            |        |                      | 0.79 (0.63-0.99) | 0.044            | 0.76 (0.62-0.95) | 0.016                  | 0.89 (0.72-1.10) | 0.300                       |        |                      |   |                      |   |                      |   |
| Unclear                           |                          | 176                                                                | 41,063           | 1.25 (1.05-1.49) | 0.010            |        |                      | 1.07 (0.94-1.22) | 0.262            | 1.07 (0.94-1.22) | 0.260                  | 1.13 (1.00-1.29) | 0.046                       |        |                      |   |                      |   |                      |   |
| Temporal category                 | <2000                    | 49                                                                 | 7,244            | 1.00             | -                | <0.001 | 4.39                 | 1.00             | -                | 1.00             | -                      | 1.00             | -                           |        |                      |   |                      |   |                      |   |
|                                   | 2000-2010                | 206                                                                | 51,983           | 0.61 (0.47-0.79) | <0.001           |        |                      | 0.88 (0.75-1.05) | 0.166            | 0.88 (0.75-1.04) | 0.141                  | 0.90 (0.76-1.06) | 0.212                       |        |                      |   |                      |   |                      |   |
|                                   | >2010                    | 147                                                                | 31,118           | 0.56 (0.42-0.73) | <0.001           |        |                      | 0.74 (0.61-0.89) | 0.002            | 0.74 (0.62-0.89) | 0.001                  | 0.76 (0.63-0.91) | 0.004                       |        |                      |   |                      |   |                      |   |

<sup>a</sup> Variance explained by the multivariable model (adjusted R<sup>2</sup>) = 68.85%.<sup>b</sup> Variance explained by the multivariable model (adjusted R<sup>2</sup>) = 70.63%.<sup>c</sup> Variance explained by the multivariable model (adjusted R<sup>2</sup>) = 73.85%.<sup>d</sup> Other populations include populations with an undetermined risk of acquiring HSV-2 infection such as patients with cervical cancer or their spouses.<sup>e</sup> Other countries include Argentina, Barbados, Bolivia, Chile, Dominican republic, El Salvador, Guatemala, Haiti, Honduras, Jamaica, and Nicaragua.

<sup>†</sup>Sample size denotes the sample size of each study population found in the original publication.

Abbreviations: *ARR* = Adjusted risk ratio, *CI* = Confidence interval, *ELISA* = Enzyme-linked immunosorbent assay, *HIC* = High-income country, *HIV* = Human immunodeficiency virus, *HSV-2* = Herpes simplex virus type 2, *LIC* = Low-income country, *LMIC* = Lower-middle-income country, *LR* = Likelihood ratio, *RR* = Risk ratio, *STI* = Sexually transmitted infection, *UMIC* = Upper-middle-income country.

**Table S6.** Univariable and multivariable meta-regression analyses for HSV-2 seroprevalence among the different at-risk populations in Latin America and the Caribbean using the year of data collection as the temporal variable. The analysis using year of publication as the temporal variable is found in Table 3 of main text.

|                                   |                                  |                                                                    | Outcome measures | Sample size      | Univariable analysis |         |             |         | Multivariable analysis |                             |                      |         |                      |         |
|-----------------------------------|----------------------------------|--------------------------------------------------------------------|------------------|------------------|----------------------|---------|-------------|---------|------------------------|-----------------------------|----------------------|---------|----------------------|---------|
|                                   |                                  |                                                                    |                  |                  | Total n              | Total N | RR (95% CI) | p-value | LR test p-value        | Adjusted R <sup>2</sup> (%) | Model 1 <sup>a</sup> |         | Model 2 <sup>b</sup> |         |
|                                   |                                  |                                                                    |                  |                  |                      |         |             |         |                        |                             | ARR (95% CI)         | p-value | ARR (95% CI)         | p-value |
| Population characteristics        | Population type                  | General populations                                                | 236              | 56,457           | 1.00                 | -       | <0.001      | 45.98   | 1.00                   | -                           | 1.00                 | -       |                      |         |
|                                   |                                  | Intermediate-risk populations                                      | 24               | 6,775            | 1.52 (1.16-2.00)     | 0.002   |             |         | 1.65 (1.30-2.10)       | 0.001                       | 1.58 (1.24-2.01)     | <0.001  |                      |         |
|                                   |                                  | High-risk populations                                              | 93               | 25,344           | 3.09 (2.64-3.61)     | <0.001  |             |         | 3.13 (2.71-3.62)       | <0.001                      | 3.10 (2.67-3.59)     | <0.001  |                      |         |
|                                   |                                  | STI clinic attendees and symptomatic populations                   | 6                | 432              | 2.49 (1.47-4.22)     | 0.001   |             |         | 2.47 (1.52-4.00)       | <0.001                      | 2.40 (1.47-3.90)     | <0.001  |                      |         |
|                                   |                                  | HIV positive individuals and individuals in HIV discordant couples | 19               | 2,840            | 3.21 (2.38-4.32)     | <0.001  |             |         | 3.07 (2.38-3.95)       | <0.001                      | 2.95 (2.28-3.81)     | <0.001  |                      |         |
|                                   |                                  | Other populations <sup>c</sup>                                     | 24               | 3,497            | 2.42 (1.85-3.16)     | <0.001  |             |         | 1.60 (1.24-2.02)       | <0.001                      | 1.56 (1.23-1.97)     | <0.001  |                      |         |
|                                   | Age group                        | <20 years                                                          | 35               | 6,538            | 1.00                 | -       | <0.001      | 10.26   | 1.00                   | -                           | 1.00                 | -       |                      |         |
|                                   |                                  | 20-30 years                                                        | 47               | 7,751            | 2.05 (1.40-3.00)     | <0.001  |             |         | 1.64 (1.29-2.10)       | <0.001                      | 1.64 (1.27-2.11)     | <0.001  |                      |         |
|                                   |                                  | 30-40 years                                                        | 22               | 2,933            | 2.58 (1.64-4.04)     | <0.001  |             |         | 2.14 (1.60-2.86)       | <0.001                      | 2.23 (1.66-2.98)     | <0.001  |                      |         |
|                                   |                                  | >40 years                                                          | 39               | 5,940            | 2.84 (1.92-4.18)     | <0.001  |             |         | 3.01 (2.34-3.87)       | <0.001                      | 3.08 (2.39-3.97)     | <0.001  |                      |         |
|                                   |                                  | Mixed ages                                                         | 259              | 72,183           | 2.49 (1.82-3.41)     | <0.001  |             |         | 1.70 (1.38-2.10)       | <0.001                      | 1.70 (1.37-2.09)     | <0.001  |                      |         |
|                                   | Sex                              | Women                                                              | 234              | 38,816           | 1.00                 | -       | 0.001       | 4.82    | 1.00                   | -                           | 1.00                 | -       |                      |         |
|                                   |                                  | Men                                                                | 144              | 39,525           | 0.67 (0.56-0.80)     | <0.001  |             |         | 0.71 (0.63-0.79)       | <0.001                      | 0.69 (0.61-0.77)     | <0.001  |                      |         |
|                                   |                                  | Mixed sexes                                                        | 24               | 17,004           | 0.81 (0.57-1.16)     | 0.267   |             |         | 0.61 (0.47-0.79)       | <0.001                      | 0.63 (0.48-0.82)     | 0.001   |                      |         |
|                                   | Countries                        | Brazil                                                             | 106              | 25,766           | 1.00                 | -       | <0.001      | 12.58   | -                      | -                           | -                    | -       |                      |         |
|                                   |                                  | Colombia                                                           | 19               | 2,247            | 1.36 (0.91-2.01)     | 0.125   |             |         | -                      | -                           | -                    | -       |                      |         |
|                                   |                                  | Costa Rica                                                         | 13               | 2,364            | 1.46 (0.92-2.30)     | 0.102   |             |         | -                      | -                           | -                    | -       |                      |         |
|                                   |                                  | Mexico                                                             | 76               | 23,437           | 0.71 (0.56-0.91)     | 0.008   |             |         | -                      | -                           | -                    | -       |                      |         |
|                                   |                                  | Panama                                                             | 15               | 3,334            | 1.81 (1.18-2.78)     | 0.006   |             |         | -                      | -                           | -                    | -       |                      |         |
|                                   |                                  | Peru                                                               | 131              | 24,976           | 0.92 (0.74-1.14)     | 0.476   |             |         | -                      | -                           | -                    | -       |                      |         |
|                                   |                                  | Other <sup>d</sup>                                                 | 42               | 13,221           | 1.84 (1.39-2.45)     | <0.001  |             |         | -                      | -                           | -                    | -       |                      |         |
|                                   |                                  |                                                                    |                  |                  |                      |         |             |         | -                      | -                           | -                    | -       |                      |         |
|                                   | Subregions                       | Central America                                                    | 124              | 38,103           | 1.00                 | -       | 0.065       | 0.82    | 1.00                   | -                           | 1.00                 | -       |                      |         |
|                                   |                                  | South America                                                      | 264              | 54,798           | 0.95 (0.79-1.14)     | 0.606   |             |         | 1.11 (0.98-1.25)       | 0.082                       | 1.09 (0.96-1.23)     | 0.147   |                      |         |
|                                   |                                  | Caribbean                                                          | 14               | 2,444            | 1.62 (1.02-2.58)     | 0.040   |             |         | 1.10 (0.82-1.47)       | 0.506                       | 1.16 (0.86-1.56)     | 0.308   |                      |         |
|                                   | Country's income                 | LIC and LMIC                                                       | 29               | 9,846            | 1.00                 | -       | <0.001      | 9.07    | -                      | -                           | -                    | -       |                      |         |
|                                   |                                  | UMIC                                                               | 354              | 81,539           | 0.45 (0.33-0.62)     | <0.001  |             |         | -                      | -                           | -                    | -       |                      |         |
|                                   |                                  | HIC                                                                | 19               | 3,960            | 0.86 (0.54-1.36)     | 0.528   |             |         | -                      | -                           | -                    | -       |                      |         |
| Study methodology characteristics | Assay type                       | Western Blot                                                       | 94               | 11,898           | 1.00                 | -       | 0.432       | 0.00    | -                      | -                           | -                    | -       |                      |         |
|                                   |                                  | ELISA                                                              | 304              | 82,744           | 0.89 (0.73-1.09)     | 0.280   |             |         | -                      | -                           | -                    | -       |                      |         |
|                                   |                                  | Monoclonal antibody                                                | 4                | 703              | 1.24 (0.53-2.87)     | 0.614   |             |         | -                      | -                           | -                    | -       |                      |         |
|                                   | Sample size <sup>e</sup>         | <200                                                               | 81               | 7,542            | 1.00                 | -       | <0.001      | 7.27    | 1.00                   | -                           | 1.00                 | -       |                      |         |
|                                   |                                  | >200                                                               | 321              | 87,803           | 0.58 (0.47-0.71)     | <0.001  |             |         | 0.79 (0.67-0.93)       | 0.004                       | 0.73 (0.63-0.85)     | <0.001  |                      |         |
|                                   | Sampling method                  | Probability based                                                  | 151              | 47,471           | 1.00                 | -       | <0.001      | 18.05   | 1.00                   | -                           | 1.00                 | -       |                      |         |
|                                   |                                  | Non-probability based                                              | 251              | 47,874           | 2.08 (1.76-2.44)     | <0.001  |             |         | 1.17 (1.01-1.35)       | 0.030                       | 1.18 (1.02-1.36)     | 0.026   |                      |         |
|                                   | Response rate                    | ≥80%                                                               | 194              | 48,220           | 1.00                 | -       | 0.002       | 5.52    | 1.00                   | -                           | 1.00                 | -       |                      |         |
|                                   |                                  | <80%                                                               | 32               | 6,062            | 0.59 (0.42-0.82)     | 0.002   |             |         | 0.80 (0.64-1.00)       | 0.053                       | 0.78 (0.62-0.97)     | 0.030   |                      |         |
|                                   |                                  | Unclear                                                            | 176              | 41,063           | 1.25 (1.05-1.49)     | 0.010   |             |         | 1.09 (0.96-1.24)       | 0.189                       | 1.11 (0.97-1.27)     | 0.104   |                      |         |
| Temporal variables                | Year of data collection category | <2000                                                              | 151              | 27,266           | 1.00                 | -       | 0.007       | 1.94    | 1.00                   | -                           | -                    | -       |                      |         |
|                                   |                                  | 2000-2010                                                          | 231              | 53,038           | 0.65 (0.54-0.78)     | <0.001  |             |         | 0.77 (0.68-0.88)       | <0.001                      | -                    | -       |                      |         |
|                                   |                                  | >2010                                                              | 20               | 14,041           | 0.85 (0.58-1.25)     | 0.429   |             |         | 0.95 (0.75-1.20)       | 0.683                       | -                    | -       |                      |         |
|                                   | Year of data collection          | 402                                                                | 95,345           | 0.98 (0.97-0.99) | 0.024                | <0.001  | 2.98        | -       | -                      | 0.99 (0.98-0.99)            | 0.031                |         |                      |         |



<sup>a</sup> Variance explained by the multivariable model (adjusted  $R^2$ ) = 69.12%.

<sup>b</sup> Variance explained by the multivariable model (adjusted  $R^2$ ) = 68.45%.

<sup>c</sup> Other populations include populations with an undetermined risk of acquiring HSV-2 infection such as patients with cervical cancer or their spouses.

<sup>d</sup> Other countries include Argentina, Barbados, Bolivia, Chile, Dominican republic, El Salvador, Guatemala, Haiti, Honduras, Jamaica, and Nicaragua.

<sup>e</sup> Sample size denotes the sample size of each study population found in the original publication.

Abbreviations: *ARR* = Adjusted risk ratio, *CI* = Confidence interval, *ELISA* = Enzyme-linked immunosorbent assay, *HIC* = High-income country *HIV* = Human immunodeficiency virus, *HSV-2* = Herpes simplex virus type 2, *LIC* = Low-income country, *LMIC* = Lower-middle-income country, *LR* = Likelihood ratio, *RR* = Risk ratio, *STI* = Sexually transmitted infection, *UMIC* = Upper-middle-income country.

**Table S7.** Studies reporting proportions of HSV-2 virus isolation in clinically-diagnosed genital ulcer disease and in clinically-diagnosed genital herpes in Latin America and the Caribbean.

| Author, year                                             | Year(s) of data collection | Country     | Study site        | Original study design* | Sampling method | Population                                          | HSV-2 biological assay | Sample size | Proportion of HSV-2 detection (%) |
|----------------------------------------------------------|----------------------------|-------------|-------------------|------------------------|-----------------|-----------------------------------------------------|------------------------|-------------|-----------------------------------|
| <b>Patients with clinically-diagnosed GUD</b>            |                            |             |                   |                        |                 |                                                     |                        |             |                                   |
| Gomes Naveca, 2013 <sup>97</sup>                         | 2008-09                    | Brazil      | Outpatient clinic | CS                     | Conv            | Patients with primary GUD                           | PCR                    | 324         | 50.9                              |
| Gomes Naveca, 2013 <sup>97</sup>                         | 2008-09                    | Brazil      | Outpatient clinic | CS                     | Conv            | Patients with recurring GUD                         | PCR                    | 95          | 70.5                              |
| Noda, 2016 <sup>98</sup>                                 | 2012-15                    | Cuba        | Outpatient clinic | CS                     | Conv            | Male patients with GUD aged 15-20 years             | PCR                    | 18          | 77.8                              |
| Noda, 2016 <sup>98</sup>                                 | 2012-15                    | Cuba        | Outpatient clinic | CS                     | Conv            | Male patients with GUD aged 21-30 years             | PCR                    | 48          | 60.4                              |
| Noda, 2016 <sup>98</sup>                                 | 2012-15                    | Cuba        | Outpatient clinic | CS                     | Conv            | Male patients with GUD aged 31-40 years             | PCR                    | 28          | 46.4                              |
| Noda, 2016 <sup>98</sup>                                 | 2012-15                    | Cuba        | Outpatient clinic | CS                     | Conv            | Male patients with GUD aged >41 years               | PCR                    | 19          | 10.5                              |
| Valdespino-Gomez, 1995 <sup>99</sup>                     | 1990                       | Mexico      | Community         | CS                     | Conv            | FSWs with GUD                                       | IF                     | 71          | 0.0                               |
| <b>Patients with clinically-diagnosed genital herpes</b> |                            |             |                   |                        |                 |                                                     |                        |             |                                   |
| Balachandran, 1982 <sup>100</sup>                        | -                          | Puerto Rico | Outpatient clinic | CS                     | Conv            | Patients with genital herpes                        | IF                     | 12          | 91.6                              |
| Belli, 1990 <sup>101</sup>                               | 1982-83                    | Argentina   | Outpatient clinic | CS                     | Conv            | Patients with genital herpes                        | IF                     | 25          | 79.0                              |
| do Nascimento, 1998 <sup>102</sup>                       | 1995                       | Brazil      | Outpatient clinic | CS                     | Conv            | HIV positive patients with genital herpes           | PCR                    | 36          | 94.4                              |
| Hun, 1987 <sup>103</sup>                                 | -                          | Costa Rica  | Outpatient clinic | CS                     | Conv            | STI clinic attendees with genital herpes            | Virus isolation        | 12          | 75.0                              |
| Orozco-Topete, 1997 <sup>104</sup>                       | -                          | Mexico      | Outpatient clinic | RCT <sup>a</sup>       | RS              | HIV positive patients with recurrent genital herpes | Culture                | 45          | 100                               |
| Prabhakar, 1987 <sup>105</sup>                           | 1982-84                    | Jamaica     | Outpatient clinic | CS                     | Conv            | Women with genital herpes                           | IF                     | 40          | 100                               |
| Schultz, 1994 <sup>106</sup>                             | 1988-90                    | Chile       | Outpatient clinic | CS                     | Conv            | Pregnant women with genital lesions                 | IF                     | 20          | 90.0                              |
| Suárez, 1988 <sup>107</sup>                              | 1985-86                    | Chile       | Outpatient clinic | CS                     | Conv            | Patients with primary genital herpes                | IF                     | 14          | 71.5                              |
| Suárez, 1988 <sup>107</sup>                              | 1985-86                    | Chile       | Outpatient clinic | CS                     | Conv            | Patients with recurrent genital herpes              | IF                     | 64          | 90.2                              |
| Suárez, 1989 <sup>108</sup>                              | 1984-86                    | Chile       | Outpatient clinic | CS                     | Conv            | Women with genital herpes                           | IF                     | 13          | 76.9                              |

\*The reported study design is the original study design (case control, cross sectional, longitudinal cohort, or randomized controlled trial). The included seroprevalence measures are those for the baseline measures at the beginning of the study.

Abbreviations: Conv = Convenience, CS = Cross sectional, GUD = Genital ulcer disease, FSWS = Female sex workers HSV-2 = Herpes simplex virus type 2, IF = Immunofluorescence, PCR = Polymerase chain reaction, RCT = Randomized controlled trial, RS = Random sampling, STI = Sexually transmitted infections.

**Figure S2.** Forest plots presenting the outcomes of the pooled mean proportions of HSV-2 virus isolation in clinically-diagnosed genital ulcer disease and in clinically-diagnosed genital herpes in Latin America and the Caribbean.

A) Patients with GUD

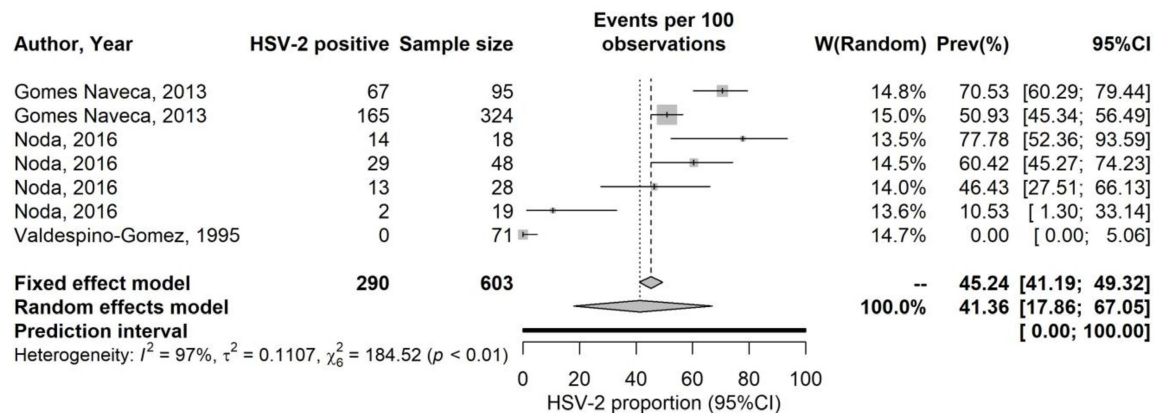

Abbreviations: CI = Confidence interval, GUD = Genital ulcer disease, HSV-2 = Herpes simplex virus type 2.

## B) Patients with genital herpes

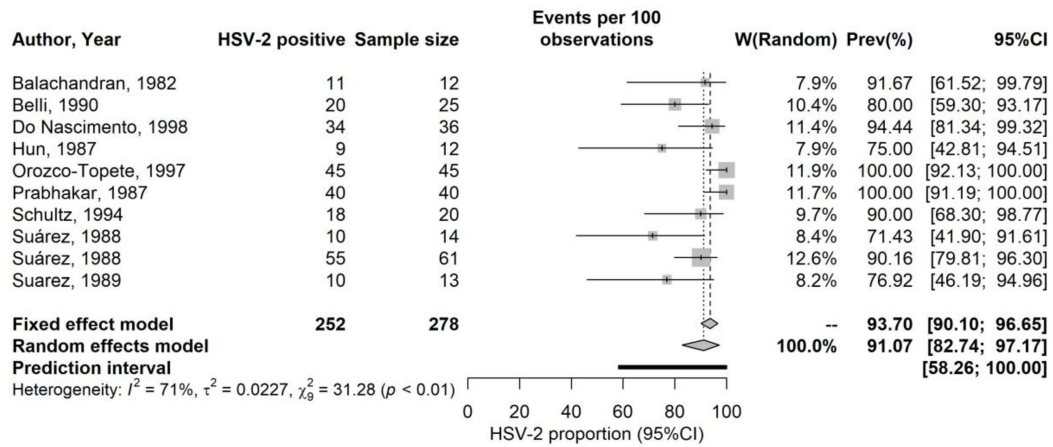

Abbreviations: CI = Confidence interval, HSV-2 = Herpes simplex virus type 2.

**Table S8.** Summary of the precision assessment and risk of bias assessment for the studies reporting HSV-2 seroprevalence in Latin America and the Caribbean.

| Quality assessment                                                       | HSV-2 seroprevalence measures |            |
|--------------------------------------------------------------------------|-------------------------------|------------|
|                                                                          | Number of studies             | %          |
| <b>Precision of seroprevalence measures<sup>a</sup></b>                  |                               |            |
| Low precision                                                            | 29                            | 17.8       |
| High precision                                                           | 134                           | 82.2       |
| <b>Risk of bias quality domain<sup>b</sup></b>                           |                               |            |
| <b>Sampling method</b>                                                   |                               |            |
| Low risk of bias                                                         | 47                            | 28.8       |
| High risk of bias                                                        | 116                           | 71.2       |
| <b>Response rate</b>                                                     |                               |            |
| Low risk of bias                                                         | 58                            | 35.6       |
| High risk of bias                                                        | 9                             | 5.5        |
| Unclear risk of bias                                                     | 96                            | 58.9       |
| <b>Summary of the risk of bias assessment</b>                            |                               |            |
| <b>Low risk of bias</b>                                                  |                               |            |
| In at least one quality domain                                           | 63                            | 38.6       |
| In both quality domains                                                  | 30                            | 18.4       |
| <b>High risk of bias</b>                                                 |                               |            |
| In at least one quality domain                                           | 37                            | 22.7       |
| In both quality domains                                                  | 4                             | 2.4        |
| <b>Seroprevalence studies where risk of bias assessment was possible</b> | <b>163</b>                    | <b>100</b> |

<sup>a</sup>Precision was assessed based on the overall sample size (not each stratum subsample size) of the study as reported in the record/publication.

<sup>b</sup>Risk of bias was assessed based on the overall sample size (not each stratum subsample size) of the study as reported in the record/publication.

Abbreviations: HSV-2 = Herpes simplex virus type 2.

## References

1. Moher D, Liberati A, Tetzlaff J, et al. Preferred reporting items for systematic reviews and meta-analyses: the PRISMA statement. *PLoS medicine* 2009;6(7):e1000097. doi: 10.1371/journal.pmed.1000097
2. Smolak A, Chemaitelly H, Hermez JG, et al. Epidemiology of Chlamydia trachomatis in the Middle East and north Africa: a systematic review, meta-analysis, and meta-regression. *Lancet Glob Health* 2019;7(9):e1197-e225. doi: 10.1016/S2214-109X(19)30279-7 [published Online First: 2019/08/14]
3. Abu-Raddad LJ, Akala FA, Semini I, et al. Characterizing the HIV/AIDS Epidemic in the Middle East and North Africa : Time for Strategic Action. World Bank. © World Bank. <https://openknowledge.worldbank.org/handle/10986/2457> License: CC BY 3.0 IGO. 2010
4. Brunham RC, Plummer FA. A general model of sexually transmitted disease epidemiology and its implications for control. *Med Clin North Am* 1990;74(6):1339-52.
5. Low N, Broutet N, Adu-Sarkodie Y, et al. Global control of sexually transmitted infections. *Lancet* 2006;368(9551):2001-16.
6. World Health Organization. Global strategy for the prevention and control of sexually transmitted infections: 2006 - 2015. Breaking the chain of transmission. WHO Press, Geneva, Switzerland. Found at: <http://www.who.int/reproductivehealth/publications/rtis/9789241563475/en/>. Last accessed April 2012. 2007
7. Lupi O. Prevalence and risk factors for herpes simplex infection among patients at high risk for HIV infection in Brazil. *Int J Dermatol* 2011;50(6):709-13.
8. Sánchez-Alemán MA, Uribe-Salas FJ, Lazcano-Ponce EC, et al. HSV-2 seroincidence among Mexican college students: the delay of sexual debut is not enough to avoid risky sexual behaviours and virus transmission. *Sex Transm Infect* 2010;86(7):565-9.
9. Konda KA, Lescano AG, Celentano DD, et al. In Peru, reporting male sex partners imparts significant risk of incident HIV/sexually transmitted infection: all men Engaging in same-sex behavior need prevention services. *Sex Transm Dis* 2013;40(7):569-74.
10. Castillo R, Konda KA, Leon SR, et al. HIV and Sexually Transmitted Infection Incidence and Associated Risk Factors Among High-Risk MSM and Male-to-Female Transgender Women in Lima, Peru. *J Acquir Immune Defic Syndr* 2015;69(5):567-75.
11. Sanchez J, Lama JR, Peinado J, et al. High HIV and ulcerative sexually transmitted infection incidence estimates among men who have sex with men in Peru: awaiting for an effective preventive intervention. *J Acquir Immune Defic Syndr* 2009;51 Suppl 1:S47-51.
12. Yanez Alvarez I, Martinez Salazar MF, Conde Gonzalez CJ, et al. Herpes simplex virus type 2 seroprevalence and seroincidence among HIV infected persons. *Enfermedades Infecciosas y Microbiologia* 2011;31(3):93-97.
13. Abraham CD, Conde-Glez CJ, Cruz-Valdez A, et al. Sexual and demographic risk factors for herpes simplex virus type 2 according to schooling level among Mexican youths. *Sex Transm Dis* 2003;30(7):549-55.
14. Alberts CJ, Schim van der Loeff MF, Papenfuss MR, et al. Association of Chlamydia trachomatis infection and herpes simplex virus type 2 serostatus with genital human papillomavirus infection in men: the HPV in men study. *Sex Transm Dis* 2013;40(6):508-15.
15. Almeida JFM, Campos AH, Marcello MA, et al. Investigation on the association between thyroid tumorigenesis and herpesviruses. *Journal of endocrinological investigation* 2017;40(8):823-29. doi: 10.1007/s40618-017-0609-y [published Online First: 2017/03/10]
16. Ashley-Morrow R, Nollkamper J, Robinson NJ, et al. Performance of Focus ELISA tests for herpes simplex virus type 1 (HSV-1) and HSV-2 antibodies among women in ten diverse geographical locations. *Clinical Microbiology and Infection* 2004;10(6):530-36. doi: <http://0-dx.doi.org.elibrary.qatar-weill.cornell.edu/10.1111/j.1469-0691.2004.00836.x>

17. Boulos R, Ruff AJ, Nahmias A, et al. Herpes simplex virus type 2 infection, syphilis, and hepatitis B virus infection in Haitian women with human immunodeficiency virus type 1 and human T lymphotropic virus type I infections. The Johns Hopkins University (JHU)/Centre pour le Developpement et la Santé (CDS) HIV Study Group. *J Infect Dis* 1992;166(2):418-20.
18. Cárcamo CP, Campos PE, García PJ, et al. Prevalences of sexually transmitted infections in young adults and female sex workers in Peru: a national population-based survey. *Lancet Infect Dis* 2012;12(10):765-73.
19. Carvalho M, De Carvalho S, Pannuti CS, et al. Prevalence of herpes simplex type 2 antibodies and a clinical history of herpes in three different populations in Campinas City, Brazil. *International Journal of Infectious Diseases* 1999;3(2):94-98. doi: <http://0-dx.doi.org.elibrary.qatar-weill.cornell.edu/10.1016/S1201-9712%2899%2990016-4>
20. Clark JL, Konda KA, Munayco CV, et al. Prevalence of HIV, herpes simplex virus-2, and syphilis in male sex partners of pregnant women in Peru. *BMC Public Health* 2008;8:65-65.
21. Clemens SAC, Farhat CK. Seroprevalence of herpes simplex 1-2 antibodies in Brazil. *Rev Saude Publica* 2010;44(4):726-34.
22. Conde-Glez C, Lazcano-Ponce E, Rojas R, et al. Seroprevalences of varicella-zoster virus, herpes simplex virus and cytomegalovirus in a cross-sectional study in Mexico. *Vaccine* 2013;31(44):5067-74.
23. Conde-Gonzalez CJ, Lazcano-Ponce E, Hernandez-Giron C, et al. [Seroprevalence of type 2 herpes simplex virus infection in 3 population groups of Mexico City]. *Salud publica de Mexico* 2003;45 Supp 5:S608-16. [published Online First: 2004/02/21]
24. Cowan FM, French RS, Mayaud P, et al. Seroepidemiological study of herpes simplex virus types 1 and 2 in Brazil, Estonia, India, Morocco, and Sri Lanka. *Sex Transm Infect* 2003;79(4):286-90.
25. Da Rosa-Santos OL, Gonçalves Da Silva A, Pereira AC. Herpes simplex virus type 2 in Brazil: seroepidemiologic survey. *Int J Dermatol* 1996;35(11):794-6.
26. De Sanjose S, Munoz N, Bosch F, et al. Sexually transmitted agents and cervical neoplasia in Colombia and Spain. *International Journal of Cancer* 1994;56(3):358-63.
27. Domercant JW, Jean Louis F, Hulland E, et al. Seroprevalence of Herpes Simplex Virus type-2 (HSV-2) among pregnant women who participated in a national HIV surveillance activity in Haiti. *BMC Infect Dis* 2017;17(1):577-77.
28. Gabster A, Pascale JM, Cislighi B, et al. High Prevalence of Sexually Transmitted Infections, and High-Risk Sexual Behaviors Among Indigenous Adolescents of the Comarca Ngäbe-Buglé, Panama. *Sex Transm Dis* 2019;46(12):780-87.
29. Gonzalez TT, Sabino EC, Murphy EL, et al. Human immunodeficiency virus test-seeking motivation in blood donors, São Paulo, Brazil. *Vox Sang* 2006;90(3):170-6.
30. Gonzalez TT, Blatyta PF, Santos FM, et al. Does offering human immunodeficiency virus testing at the time of blood donation reduce transfusion transmission risk and increase disclosure counseling? Results of a randomized controlled trial, São Paulo, Brazil. *Transfusion* 2015;55(6):1214-22.
31. Gutierrez J-P, Bertozzi SM, Conde-Glez CJ, et al. Risk behaviors of 15-21 year olds in Mexico lead to a high prevalence of sexually transmitted infections: results of a survey in disadvantaged urban areas. *BMC Public Health* 2006;6:49-49.
32. Gutierrez JP, Conde-González CJ, Walker DM, et al. Herpes simplex virus type 2 among Mexican high school adolescents: prevalence and association with community characteristics. *Arch Med Res* 2007;38(7):774-82.
33. Herrera-Ortiz A, Conde-Glez CJ, Vergara-Ortega DN, et al. Avidity of antibodies against HSV-2 and risk to neonatal transmission among Mexican pregnant women. *Infect Dis Obstet Gynecol* 2013;2013:140142-42.
34. Juarez-Figueroa LA, Uribe-Salas FJ, Conde-Glez CJ, et al. Hepatitis B markers in men seeking human immunodeficiency virus antibody testing in Mexico City. *Sex Transm Dis* 1997;24(4):211-7. [published Online First: 1997/04/01]

35. Konda KA, Klausner JD, Lescano AG, et al. The epidemiology of herpes simplex virus type 2 infection in low-income urban populations in coastal Peru. *Sex Transm Dis* 2005;32(9):534-41.
36. Lazcano-Ponce E, Smith JS, Muñoz N, et al. High prevalence of antibodies to herpes simplex virus type 2 among middle-aged women in Mexico City, Mexico: a population-based study. *Sex Transm Dis* 2001;28(5):270-6.
37. Levett PN. Seroprevalence of HSV-1 and HSV-2 in Barbados. *Med Microbiol Immunol* 2005;194(1-2):105-7.
38. Moreira-Soto A, Cabral R, Pedroso C, et al. Exhaustive TORCH Pathogen Diagnostics Corroborate Zika Virus Etiology of Congenital Malformations in Northeastern Brazil. *mSphere* 2018;3(4) doi: 10.1128/mSphere.00278-18 [published Online First: 2018/08/10]
39. Muñoz N, Kato I, Bosch FX, et al. Cervical cancer and herpes simplex virus type 2: case-control studies in Spain and Colombia, with special reference to immunoglobulin-G sub-classes. *Int J Cancer* 1995;60(4):438-42.
40. Nascimento MC, Ferreira S, Sabino E, et al. Performance of the HerpeSelect (Focus) and Kalon enzyme-linked immunosorbent assays for detection of antibodies against herpes simplex virus type 2 by use of monoclonal antibody-blocking enzyme immunoassay and clinicovirological reference standards in Brazil. *Journal of clinical microbiology* 2007;45(7):2309-11. doi: 10.1128/jcm.00144-07 [published Online First: 2007/05/18]
41. Nascimento MC, De Souza VA, Sumita LM, et al. Prevalence of, and risk factors for Kaposi's sarcoma-associated herpesvirus infection among blood donors in Brazil: A multi-center serosurvey. *Journal of Medical Virology* 2008;80(7):1202-10. doi: <http://0-dx.doi.org.elibrary.qatar-weill.cornell.edu/10.1002/jmv.21188>
42. Nascimento MC, Sumita LM, Souza VU, et al. Seroprevalence of Kaposi sarcoma-associated herpesvirus and other serologic markers in the Brazilian Amazon. *Emerging infectious diseases* 2009;15(4):663-7. doi: 10.3201/eid1504.081488 [published Online First: 2009/04/01]
43. Oberle MW, Rosero-Bixby L, Lee FK, et al. Herpes simplex virus type 2 antibodies: high prevalence in monogamous women in Costa Rica. *Am J Trop Med Hyg* 1989;41(2):224-9.
44. Patnaik P, Herrero R, Morrow RA, et al. Type-specific seroprevalence of herpes simplex virus type 2 and associated risk factors in middle-aged women from 6 countries: the IARC multicentric study. *Sex Transm Dis* 2007;34(12):1019-24.
45. Patzi-Churqui M, Terrazas-Aranda K, Liljeqvist JA, et al. Prevalence of viral sexually transmitted infections and HPV high-risk genotypes in women in rural communities in the Department of La Paz, Bolivia. *BMC Infect Dis* 2020;20(1):204. doi: 10.1186/s12879-020-4931-1 [published Online First: 2020/03/08]
46. Paz-Bailey G, Morales-Miranda S, Jacobson JO, et al. High rates of STD and sexual risk behaviors among Garífunas in Honduras. *J Acquir Immune Defic Syndr* 2009;51 Suppl 1:S26-34.
47. Rodríguez AC, Castle PE, Smith JS, et al. A population based study of herpes simplex virus 2 seroprevalence in rural Costa Rica. *Sex Transm Infect* 2003;79(6):460-5.
48. Sánchez J, Gotuzzo E, Escamilla J, et al. Gender differences in sexual practices and sexually transmitted infections among adults in Lima, Peru. *Am J Public Health* 1996;86(8):1098-107.
49. Sánchez-Alemán MA, Conde-Glez CJ, Gayet C, et al. Sexual behavior and herpes simplex virus 2 infection in college students. *Arch Med Res* 2005;36(5):574-80.
50. Sánchez-Alemán MA, Conde-Glez CJ, Uribe-Salas F. Core group approach to identify college students at risk for sexually transmitted infections. *Rev Saude Publica* 2008;42(3):428-36.
51. Sierra CA, Bedoya AM, Paris S, et al. Prevalence of specific herpes simplex virus-2 antibodies and associated factors in women of a rural town of Colombia. *Trans R Soc Trop Med Hyg* 2011;105(4):232-8.
52. Smith JS, Herrero R, Muñoz N, et al. Prevalence and risk factors for herpes simplex virus type 2 infection among middle-age women in Brazil and the Philippines. *Sex Transm Dis* 2001;28(4):187-94.



53. Smith JS, Herrero R, Bosetti C, et al. Herpes simplex virus-2 as a human papillomavirus cofactor in the etiology of invasive cervical cancer. *Journal of the National Cancer Institute* 2002;94(21):1604-13. [published Online First: 2002/11/07]
54. Uribe-Salas F, Palma-Coca O, Sánchez-Alemán MA, et al. Population-based prevalence of antibodies against herpes simplex virus type 2 and socio-demographic characteristics in Mexico. *Trans R Soc Trop Med Hyg* 2009;103(2):151-8.
55. Vaccarella S, Franceschi S, Herrero R, et al. Sexual behavior, condom use, and human papillomavirus: pooled analysis of the IARC human papillomavirus prevalence surveys. *Cancer Epidemiology and Prevention Biomarkers* 2006;15(2):326-33.
56. Weinberg A, Canto CL, Pannuti CS, et al. Herpes simplex virus type 2 infection in pregnancy: asymptomatic viral excretion at delivery and seroepidemiologic survey of two socioeconomically distinct populations in Sao Paulo, Brazil. *Revista do Instituto de Medicina Tropical de Sao Paulo* 1993;35(3):285-90. [published Online First: 1993/05/01]
57. Zamilpa-Mejía LG, Uribe-Salas F, Juárez-Figueroa L, et al. Prevalencia y factores asociados con sífilis y herpes genital en dos grupos de población femenina. *Salud publica de Mexico* 2003;45 Supp 5:S617-23.
58. Benzaken A, Sabidó M, Galban E, et al. HIV and sexually transmitted infections at the borderlands: situational analysis of sexual health in the Brazilian Amazon. *Sex Transm Infect* 2012;88(4):294-300.
59. Celentano DD, Mayer KH, Pequegnat W, et al. Prevalence of Sexually Transmitted Diseases and Risk Behaviors from the NIMH Collaborative HIV/STD Prevention Trial. *International journal of sexual health : official journal of the World Association for Sexual Health* 2010;22(4):272-84. doi: 10.1080/19317611.2010.494092 [published Online First: 2010/01/01]
60. Clark JL, Lescano AG, Konda KA, et al. Syndromic management and STI control in urban Peru. *PLoS One* 2009;4(9):e7201-e01.
61. Couture M-C, Soto JC, Akom E, et al. Clients of female sex workers in Gonaives and St-Marc, Haiti characteristics, sexually transmitted infection prevalence and risk factors. *Sex Transm Dis* 2008;35(10):849-55.
62. Pinho AA, Chinaglia M, Lippman SA, et al. Prevalence and factors associated with HSV-2 and hepatitis B infections among truck drivers crossing the southern Brazilian border. *Sex Transm Infect* 2011;87(7):553-9.
63. Sabidó M, Lahuerta M, Montoliu A, et al. Human immunodeficiency virus, sexually transmitted infections, and risk behaviors among clients of sex workers in Guatemala: are they a bridge in human immunodeficiency virus transmission? *Sex Transm Dis* 2011;38(8):735-42.
64. Uribe-Salas F, Hernandez-Giron C, Conde-Gonzalez C, et al. Characteristics related to STD/HIV in men working in Mexico City bars where female prostitution takes place. *Salud publica de Mexico* 1995;37(5):385-93.
65. Villarroel-Torrico M, Montano K, Flores-Arispe P, et al. Syphilis, human immunodeficiency virus, herpes genital and hepatitis B in a women's prison in Cochabamba, Bolivia: prevalence and risk factors. *Revista espanola de sanidad penitenciaria* 2018;20(2):47-54. [published Online First: 2018/09/20]
66. Brito MO, Hodge D, Donastorg Y, et al. Risk behaviours and prevalence of sexually transmitted infections and HIV in a group of Dominican gay men, other men who have sex with men and transgender women. *BMJ Open* 2015;5(4):e007747-e47.
67. Conde-Glez CJ, Juárez-Figueroa L, Uribe-Salas F, et al. Analysis of herpes simplex virus 1 and 2 infection in women with high risk sexual behaviour in Mexico. *Int J Epidemiol* 1999;28(3):571-6.
68. HIV, STD and risk behaviors among female sex worker in El Salvador. Poster CDC0622. International AIDS Conference; 2010; Vienna, Austria.
69. Gotuzzo E, Sanchez J, Escamilla J, et al. Human T cell lymphotropic virus type I infection among female sex workers in Peru. *J Infect Dis* 1994;169(4):754-9. [published Online First: 1994/04/01]
70. Hakre S, Arteaga G, Núñez AE, et al. Prevalence of HIV and other sexually transmitted infections and factors associated with syphilis among female sex workers in Panama. *Sex Transm Infect* 2013;89(2):156-64.

71. Hakre S, Arteaga GB, Núñez AE, et al. Prevalence of HIV, syphilis, and other sexually transmitted infections among MSM from three cities in Panama. *J Urban Health* 2014;91(4):793-808.
72. Hernandez F, Arambu N, Alvarez B, et al. High incidence of HIV and low HIV prevention coverage among men who have sex with men in Managua, Nicaragua. *Sexually Transmitted Infections* 2011;87(SUPPL. 1):A146. doi: <http://0-dx.doi.org.elibrary.qatar-weill.cornell.edu/10.1136/sextrans-2011-050108.112>
73. Lama JR, Lucchetti A, Suarez L, et al. Association of herpes simplex virus type 2 infection and syphilis with human immunodeficiency virus infection among men who have sex with men in Peru. *J Infect Dis* 2006;194(10):1459-66.
74. Morales-Miranda S, Paredes M, Arambu N, et al. HIV, STD and risk behaviors among men who have sex with men, female sex workers, and indigenous Garífuna population in Honduras. . WEAX0305 In: International AIDS Conference Mexico, Mexico, 2008.
75. Perez-Brumer AG, Konda KA, Salvatierra HJ, et al. Prevalence of HIV, STIs, and risk behaviors in a cross-sectional community- and clinic-based sample of men who have sex with men (MSM) in Lima, Peru. *PLoS One* 2013;8(4):e59072-e72.
76. Perla ME, Ghee AE, Sánchez S, et al. Genital tract infections, bacterial vaginosis, HIV, and reproductive health issues among Lima-based clandestine female sex workers. *Infect Dis Obstet Gynecol* 2012;2012:739624-24.
77. Rodrigues J, Grinsztejn B, Bastos FI, et al. Seroprevalence and factors associated with herpes simplex virus type 2 among HIV-negative high-risk men who have sex with men from Rio de Janeiro, Brazil: a cross-sectional study. *BMC Infect Dis* 2009;9:39-39.
78. Sanchez J, Gotuzzo E, Escamilla J, et al. Sexually transmitted infections in female sex workers: reduced by condom use but not by a limited periodic examination program. *Sex Transm Dis* 1998;25(2):82-9. [published Online First: 1998/03/28]
79. Sanchez J, Lama JR, Kusunoki L, et al. HIV-1, sexually transmitted infections, and sexual behavior trends among men who have sex with men in Lima, Peru. *J Acquir Immune Defic Syndr* 2007;44(5):578-85.
80. Shah NS, Kim E, de Maria Hernández Ayala F, et al. Performance and comparison of self-reported STI symptoms among high-risk populations - MSM, sex workers, persons living with HIV/AIDS - in El Salvador. *Int J STD AIDS* 2014;25(14):984-91.
81. Silva-Santisteban A, Raymond HF, Salazar X, et al. Understanding the HIV/AIDS epidemic in transgender women of Lima, Peru: results from a sero-epidemiologic study using respondent driven sampling. *AIDS Behav* 2012;16(4):872-81.
82. Soto RJ, Ghee AE, Nunez CA, et al. Sentinel surveillance of sexually transmitted infections/HIV and risk behaviors in vulnerable populations in 5 Central American countries. *J Acquir Immune Defic Syndr* 2007;46(1):101-11.
83. Uribe-Salas F, Hernández-Avila M, Juárez-Figueroa L, et al. Risk factors for herpes simplex virus type 2 infection among female commercial sex workers in Mexico City. *Int J STD AIDS* 1999;10(2):105-11.
84. Uribe-Salas F, Conde-Glez CJ, Juárez-Figueroa L, et al. Socio-demographic characteristics and sex practices related to herpes simplex virus type 2 infection in Mexican and Central American female sex workers. *Epidemiol Infect* 2003;131(2):859-65.
85. Zunt JR, La Rosa AM, Peinado J, et al. Risk factors for HTLV-II infection in Peruvian men who have sex with men. *Am J Trop Med Hyg* 2006;74(5):922-5.
86. Martinez MJ, Navarrete N, Santander E, et al. Seroprevalence of herpes simplex virus type 2 (HSV-2) infection in two clinics for sexually transmitted diseases in Santiago, Chile. *Revista medica de Chile* 2005;133(3):302-06.
87. Batista MD, Ferreira S, Sauer MM, et al. High human herpesvirus 8 (HHV-8) prevalence, clinical correlates and high incidence among recently HIV-1-infected subjects in Sao Paulo, Brazil. *PLoS ONE* 2009;4(5):e5613. doi: <http://0-dx.doi.org.elibrary.qatar-weill.cornell.edu/10.1371/journal.pone.0005613>
88. Lima LRP, Fernandes LEBC, Villela DAM, et al. Co-infection of human herpesvirus type 2 (HHV-2) and human immunodeficiency virus (HIV) among pregnant women in Rio de Janeiro, Brazil. *AIDS Care* -

*Psychological and Socio-Medical Aspects of AIDS/HIV* 2018;30(3):378-82. doi: <http://0-dx.doi.org.elibrary.qatar-weill.cornell.edu/10.1080/09540121.2017.1378798>

89. Paz-Bailey G, Isern Fernandez V, Morales Miranda S, et al. Unsafe sexual behaviors among HIV-positive men and women in Honduras: the role of discrimination, condom access, and gender. *Sex Transm Dis* 2012a;39(1):35-41.
90. Paz-Bailey G, Shah N, Creswell J, et al. Risk behaviors and STI prevalence among people with HIV in El Salvador. *Open AIDS J* 2012b;6:205-12.
91. Santos FC, De Oliveira SA, Setubal S, et al. Seroepidemiological study of herpes simplex virus type 2 in patients with the acquired immunodeficiency syndrome in the City of Niteroi, Rio de Janeiro, Brazil. *Memorias do Instituto Oswaldo Cruz* 2006;101(3):315-19.
92. Bahena-Roman M, Sanchez-Aleman MA, Contreras-Ochoa CO, et al. Prevalence of active infection by herpes simplex virus type 2 in patients with high-risk human papillomavirus infection: A cross-sectional study. *J Med Virol* 2020 doi: 10.1002/jmy.25668 [published Online First: 2020/01/12]
93. Calderon G, Pinto M, Pizarro R, et al. Viral infections associated in breast cancer patients in a Latin American cancer institute. *Annals of Surgical Oncology* 2018;25(2 Supplement 1):148-49. doi: <http://0-dx.doi.org.elibrary.qatar-weill.cornell.edu/10.1245/s10434-018-6534-2>
94. Castle PE, Escoffery C, Schachter J, et al. Chlamydia trachomatis, herpes simplex virus 2, and human T-cell lymphotropic virus type 1 are not associated with grade of cervical neoplasia in Jamaican colposcopy patients. *Sex Transm Dis* 2003;30(7):575-80.
95. DeBritton RC, Hildesheim A, De Lao SL, et al. Human papillomaviruses and other influences on survival from cervical cancer in Panama. *Obstet Gynecol* 1993;81(1):19-24.
96. Stone KM, Zaidi A, Rosero-Bixby L, et al. Sexual behavior, sexually transmitted diseases, and risk of cervical cancer. *Epidemiology* 1995;6(4):409-14.
97. Gomes Naveca F, Sabidó M, Amaral Pires de Almeida T, et al. Etiology of genital ulcer disease in a sexually transmitted infection reference center in Manaus, Brazilian Amazon. *PLoS One* 2013;8(5):e63953-e53.
98. Noda AA, Blanco O, Correa C, et al. Etiology of Genital Ulcer Disease in Male Patients Attending a Sexually Transmitted Diseases Clinic: First Assessment in Cuba. *Sex Transm Dis* 2016;43(8):494-7.
99. Valdespino-Gomez JL, Garcia-Garcia ML, del Rio-Chiriboga C, et al. Sexually transmitted diseases and the HIV/AIDS epidemic. *Salud publica de Mexico* 1995;37(6):549-55.
100. Balachandran N, Frame B, Chernesky M, et al. Identification and typing of herpes simplex viruses with monoclonal antibodies. *Journal of clinical microbiology* 1982;16(1):205-08.
101. Belli L, Irigoyen MH, Casco RH, et al. Pautas para el manejo de la infección herpética genital en la experiencia de un centro de atención de ETS en Buenos Aires (Argentina). *Med Cutan Ibero Lat Am* 1990;18(1):44-8.
102. do Nascimento MC, Sumita LM, de Souza VA, et al. Detection and direct typing of herpes simplex virus in perianal ulcers of patients with AIDS by PCR. *Journal of clinical microbiology* 1998;36(3):848-49.
103. Hun L, Fuentes LG. Diagnóstico del laboratorio de virus herpes simplex en Costa Rica. *Rev Costarric Cienc Med* 1987;8(3):143-8.
104. Orozco-Topete R, Sierra-Madero J, Cano-Dominguez C, et al. Safety and efficacy of Virend for topical treatment of genital and anal herpes simplex lesions in patients with AIDS. *Antiviral Research* 1997;35(2):91-103. doi: <http://0-dx.doi.org.elibrary.qatar-weill.cornell.edu/10.1016/S0166-3542%2897%2900015-6>
105. Prabhakar P, Allam MG, Prabhu PS, et al. Genital herpes in Jamaica. A clinical and pathological study (1982-1984). *West Indian Med J* 1987;36(3):154-8.
106. Schultz R, Suarez M, Saavedra T. Follow-up of pregnant women at high risk of transmitting herpes simplex virus. *Bulletin of the Pan American Health Organization* 1994;28(2):163-8. [published Online First: 1994/06/01]
107. Suárez M, Labbé V, Saavedra T, et al. Tipos víricos del herpes simple asociados a infecciones genitales primarias y recurrentes en Chile. *Bol Oficina Sanit Panam* 1988;105(1):13-9.

108. Suarez M, Briones H, Dubinovsky S, et al. Genital herpes infection in Chilean female university students. *Boletin de la Oficina Sanitaria Panamericana Pan American Sanitary Bureau* 1989;106(5):389-95.
